# Supplementary material
Source: Research Square preprint supplement (doi:10.21203/rs.3.rs-10237727/v1)
Supplement: Supplementary file 1 [file 94ebf8dd126141fffeef2f54.docx]

**Benchmarking 26 DFT Functionals for Zeolites: Structural Metrics, Tetrahedron-Normalized Properties, Energetic Accuracy, and the PBE-Grimme Paradox**

Faezeh Gorgichia, Mehdi Shahrakia*, Tayebeh Hadadib

a Department of Chemistry, Faculty of Science, University of Sistan and Baluchestan, P.O. Box 98135-674, Zahedan, Iran

b Department of Food Sciences and Technology, College of Agriculture, University of Zabol, P.O. Box 98613-35856, Zabol, Iran

*E-mail: mehdishahraki@chem.usb.ac.ir

**3.3S. Comprehensive Analysis of Si-O Bond Length Errors for 26 DFT Functionals**

The Si-O bond length is a fundamental structural descriptor in zeolite frameworks, directly reflecting the accuracy of a functional's description of the primary covalent interaction between silicon and oxygen atoms. Across the four zeolite frameworks examined (α-quartz, NAT, HEU, and OFF), the percent relative errors (PRE) for each functional are compiled in **Table 1S**, where positive values indicate overestimation and negative values indicate underestimation relative to experimental reference data from the Materials Studio database. As shown in **Table 2S**, which ranks all 26 functionals by increasing mean absolute error (MAE) and also reports root mean square errors (RMSE), LDA functionals exhibit surprisingly low MAE values for this metric. LDA-PWC achieves the lowest MAE of 0.681 Å, followed by LDA-VWN (0.834 Å), LDA-VWN-OBS (0.834 Å), and LDA-PWC-OBS (0.855 Å). However, as discussed extensively in the main text, this apparent accuracy stems from error cancellation rather than correct physical description; LDA functionals suffer from systematic overbinding that leads to compressed unit cells and underestimated bond angles, and their success on this isolated metric should not be misinterpreted as general structural fidelity. Among GGA functionals, PBEsol (MAE = 0.933 Å) and HCTH (MAE = 0.937 Å) show the best performance, with HCTH offering a superior balance across all structural criteria. The meta-GGA functional TPSS (MAE = 1.005 Å) is the best performer in its family for bond length prediction.

At the opposite end of the ranking, three functionals exhibit unacceptable errors. m‑GGA‑MS0 ranks last with a catastrophic MAE of 3.120 Å and an RMSE of 4.571 Å, and it also shows the largest MAE‑RMSE gap (1.451 Å), indicating extreme framework‑specific outliers. m‑GGA‑M11‑L follows with MAE = 2.634 Å, and GGA‑RPBE with MAE = 1.691 Å. Notably, while m‑GGA‑TPSS performs well (MAE = 1.005 Å, rank 7), its Grimme‑corrected variant m‑GGA‑TPSS‑Grimme drops dramatically to rank 22 (MAE = 1.499 Å), confirming that empirical dispersion corrections are often detrimental for meta‑GGA functionals. **Table 3S** isolates the six best performers. LDA-PWC, LDA-VWN, LDA-VWN-OBS, and LDA-PWC-OBS occupy the top four positions, followed by GGA-PBEsol and GGA-HCTH. A critical note accompanies this ranking: the low MAE values of LDA functionals arise from error cancellation, making them physically unreliable despite their numerical accuracy. For practical, transferable predictions, GGA-PBEsol and especially GGA-HCTH are the preferred choices. **Table 4S** lists the five worst performers. m‑GGA‑MS0 is catastrophic and should never be used. m‑GGA‑M11‑L is very poor, GGA‑RPBE and GGA‑BOP are poor, and m‑GGA‑TPSS‑Grimme demonstrates that Grimme correction is harmful for this meta‑GGA functional. **Table 5S** summarizes performance by functional family. The LDA family shows the lowest average MAE (0.80 Å) but the narrowest range (0.681–0.855 Å). The GGA family exhibits an average MAE of 1.19 Å with a wide range (0.933–1.691 Å). The meta‑GGA family shows the highest average MAE (1.69 Å) and the widest range (1.005–3.120 Å), reflecting the high sensitivity of meta‑GGA functionals to their specific parameterization and to the addition of dispersion corrections. Finally, **Table 6S** provides a concise final summary. Overall, LDA-PWC gives the smallest numerical error (0.681 Å), but its systematic structural deficiencies outweigh this. The best GGA functional for bond length is PBEsol (0.933 Å), and the best meta‑GGA is TPSS (1.005 Å). The most reliable overall functional for bond length prediction, when considered together with its excellent performance on all other structural and energetic criteria, is GGA-HCTH (0.937 Å). m‑GGA‑MS0 is the worst performer by a substantial margin and must be avoided entirely. This detailed analysis of Si–O bond length errors demonstrates that while LDA functionals can appear competitive on isolated local metrics, their success is deceptive. For genuinely reliable and transferable predictions, the balanced performance of GGA-HCTH and GGA-PBEsol is strongly preferred.

**Table 1S. Percent Relative Si-O bond length errors (PRE) (Å) for 26 DFT functionals on QUA, NAT, HEU, and OFF zeolites.**

| FUNCTIONALS | Nat | HEU | OFF | Qua |
| --- | --- | --- | --- | --- |
| LDA-PWC | 0.0310 | 0.0523 | -1.9570 | 0.6843 |
| LDA-PWC-OBS | -0.0621 | -0.7492 | -2.0480 | 0.5599 |
| LDA-VWN | 0.0155 | -0.7056 | -1.9770 | 0.6532 |
| LDA-VWN-OBS | -0.0621 | -0.6523 | -2.0930 | 0.5288 |
| GGA-PW91 | 1.1639 | 0.5183 | -1.0290 | 1.7729 |
| GGA-PW91-OBS | 1.0708 | 0.4835 | -1.1050 | 1.6485 |
| GGA-BP | 1.3501 | 0.7448 | -0.8870 | 1.8974 |
| GGA-PBE | 1.3035 | 0.7013 | -0.8720 | 1.8974 |
| GGA-PBE-TS | 1.1794 | 0.5706 | -0.9940 | 1.6174 |
| GGA-PBE-Grimme | 1.3966 | 0.6926 | -0.3040 | 1.6796 |
| GGA-BLYP | 1.8777 | 1.0323 | -0.5170 | 2.1462 |
| GGA-BLYP-TS | 1.3191 | 0.5401 | -1.2010 | 1.2131 |
| GGA-BLYP-Grimme | 1.7381 | 0.9539 | -0.7550 | 1.8663 |
| GGA-BOP | 2.4053 | 1.2675 | -0.3950 | 2.3639 |
| GGA-VWN-BP | 1.4587 | 0.6926 | -0.8970 | 1.8974 |
| GGA-RPBE | 2.6536 | 1.2588 | -0.4560 | 2.3950 |
| GGA-HCTH | 0.9001 | 0.1220 | -1.2320 | 1.4930 |
| GGA-PBEsol | 0.7914 | 0.1786 | -1.3640 | 1.3997 |
| m-GGA-M06-L | -0.4190 | -1.2109 | -1.8200 | -0.7154 |
| m-GGA-M11-L | -1.8777 | -3.5412 | -3.4060 | 1.7107 |
| m-GGA-MS0 | 0.5587 | -1.5681 | -1.4900 | 8.8647 |
| m-GGA-MS1 | 0.1552 | -0.9408 | -1.1200 | 2.4883 |
| m-GGA-MS2 | 0.6052 | -0.9321 | -2.2200 | 1.9596 |
| m-GGA-revTPSS | 0.2948 | -0.4399 | -1.1860 | 3.0482 |
| m-GGA-TPSS | 0.4500 | -0.2918 | -1.0700 | 2.2084 |
| m-GGA-TPSS-Grimme | -0.0466 | -1.6247 | -1.2470 | 3.0793 |

**Table 2S.** Ranking of 26 DFT functionals based on MAE and RMSE for Si–O bond length (Å) averaged over four zeolite frameworks (α-quartz, NAT, HEU, and OFF). Functionals are ordered by increasing MAE (lowest to highest). RMSE values are consistently higher than MAE values, reflecting the presence of framework‑specific outliers. The largest MAE‑RMSE gap is observed for m‑GGA‑MS0 (MAE = 3.120 Å, RMSE = 4.571 Å), confirming its catastrophic performance and complete unsuitability for zeolite simulations.

| Rank | Functional | Family | MAE (Å) | RMSE (Å) |
| --- | --- | --- | --- | --- |
| 1 | LDA-PWC | LDA | 0.681 | 1.037 |
| 2 | LDA-VWN | LDA | 0.834 | 1.099 |
| 3 | LDA-VWN-OBS | LDA | 0.834 | 1.128 |
| 4 | LDA-PWC-OBS | LDA | 0.855 | 1.126 |
| 5 | GGA-PBEsol | GGA | 0.933 | 1.058 |
| 6 | GGA-HCTH | GGA | 0.937 | 1.069 |
| 7 | m-GGA-TPSS | meta-GGA | 1.005 | 1.256 |
| 8 | GGA-PBE-Grimme | GGA | 1.018 | 1.156 |
| 9 | m-GGA-M06-L | meta-GGA | 1.041 | 1.169 |
| 10 | GGA-BLYP-TS | GGA | 1.068 | 1.112 |
| 11 | GGA-PW91-OBS | GGA | 1.077 | 1.153 |
| 12 | GGA-PBE-TS | GGA | 1.090 | 1.153 |
| 13 | GGA-PW91 | GGA | 1.121 | 1.207 |
| 14 | m-GGA-MS1 | meta-GGA | 1.176 | 1.445 |
| 15 | GGA-PBE | GGA | 1.194 | 1.280 |
| 16 | GGA-BP | GGA | 1.220 | 1.300 |
| 17 | GGA-VWN-BP | GGA | 1.236 | 1.324 |
| 18 | m-GGA-revTPSS | meta-GGA | 1.242 | 1.657 |
| 19 | GGA-BLYP-Grimme | GGA | 1.328 | 1.413 |
| 20 | GGA-BLYP | GGA | 1.393 | 1.538 |
| 21 | m-GGA-MS2 | meta-GGA | 1.429 | 1.581 |
| 22 | m-GGA-TPSS-Grimme | meta-GGA | 1.499 | 1.849 |
| 23 | GGA-BOP | GGA | 1.608 | 1.812 |
| 24 | GGA-RPBE | GGA | 1.691 | 1.909 |
| 25 | m-GGA-M11-L | meta-GGA | 2.634 | 2.766 |
| 26 | m-GGA-MS0 | meta-GGA | 3.120 | 4.571 |

**Table 3S.** The Best Functionals (Lowest MAE) Based on MAE for Si–O Bond Length

| Rank | Functional | Family | MAE (Å) | Note |
| --- | --- | --- | --- | --- |
| 1 | LDA-PWC | LDA | 0.681 | Smallest error – but due to error cancellation |
| 2 | LDA-VWN | LDA | 0.834 | Low error but physically unreliable |
| 3 | LDA-VWN-OBS | LDA | 0.834 | Similar to LDA-VWN |
| 4 | LDA-PWC-OBS | LDA | 0.855 | Acceptable but LDA-based |
| 5 | GGA-PBEsol | GGA | 0.933 | Best GGA for bond length |
| 6 | GGA-HCTH | GGA | 0.937 | Best overall balance across all criteria |

**Table 4S.** The Worst Functionals (Lowest MAE) Based on MAE for Si–O Bond Length

| Rank | Functional | Family | MAE (Å) | Note |
| --- | --- | --- | --- | --- |
| 26 | m-GGA-MS0 | meta-GGA | 3.120 | Catastrophic – NEVER use |
| 25 | m-GGA-M11-L | meta-GGA | 2.634 | Very poor – Unreliable |
| 24 | GGA-RPBE | GGA | 1.691 | Poor |
| 23 | GGA-BOP | GGA | 1.608 | Poor |
| 22 | m-GGA-TPSS-Grimme | meta-GGA | 1.499 | Poor – Grimme correction is detrimental |

**Table 5S.** Summary by Functional Family based on MAE for Si–O Bond Length

| Family | Best Representative | MAE (Å) | Worst Representative | MAE (Å) |
| --- | --- | --- | --- | --- |
| LDA | LDA-PWC | 0.681 | LDA-PWC-OBS | 0.855 |
| GGA | GGA-PBEsol | 0.933 | GGA-RPBE | 1.691 |
| meta-GGA | m-GGA-TPSS | 1.005 | m-GGA-MS0 | 3.120 |

**Table 6S.** Final Summary based on MAE for Si–O Bond Length

| Criterion | Best Functional | Error Value | Worst Functional | Error Value |
| --- | --- | --- | --- | --- |
| Overall (all 26 functionals) | LDA-PWC | 0.681 Å | m-GGA-MS0 | 3.120 Å |
| Best GGA | GGA-PBEsol | 0.933 Å | GGA-RPBE | 1.691 Å |
| Best meta-GGA | m-GGA-TPSS | 1.005 Å | m-GGA-MS0 | 3.120 Å |
| Most reliable overall | GGA-HCTH | 0.937 Å | — | — |

**3.4S. Comprehensive Analysis of Si-O-Si Bond Angle Errors for 26 DFT Functionals**

The Si-O-Si bond angle is a critical structural descriptor that governs the flexibility, pore architecture, and mechanical properties of zeolite frameworks. Unlike the Si-O bond length, which primarily reflects nearest‑neighbor interactions, the Si-O-Si angle captures the connectivity between adjacent tetrahedral units and is highly sensitive to framework distortion and long‑range interactions. Across the four zeolite frameworks examined (α‑quartz, NAT, HEU, and OFF), the percent relative errors for each functional are compiled in **Table 7S**, while **Tables 8S-12S** provide the complete ranking and statistical summary. As shown in **Table 7S**, which ranks all 26 functionals by increasing mean absolute error (MAE) for the Si–O–Si angle, GGA functionals dominate the top positions, with GGA‑HCTH achieving the best performance (MAE = 2.348°, RMSE = 2.697°). This functional outperforms all others by a significant margin, confirming its exceptional ability to describe the rotational barrier of the Si-O-Si linkage. GGA‑PBE (MAE = 2.500°) and GGA‑PW91 (MAE = 2.561°) follow closely, demonstrating that well‑parameterized GGA functionals provide excellent angular accuracy without empirical dispersion corrections. m‑GGA‑M06‑L is the best meta‑GGA functional for this metric (MAE = 2.627°, rank 4), while m‑GGA‑MS1 (MAE = 2.651°, rank 5) also shows good performance. LDA functionals occupy the middle of the ranking, with LDA‑VWN (MAE = 2.899°, rank 12) being the best LDA performer, but their errors are systematically higher than those of the top GGA functionals. At the lower end of **Table 8S**, several functionals exhibit unacceptably large errors. GGA‑BLYP‑TS ranks last with a catastrophic MAE of 6.035° and RMSE of 7.008°, confirming its complete unsuitability. GGA‑PBE‑Grimme (MAE = 5.002°, rank 25) also shows very poor angular accuracy, despite its excellent performance for total and binding energy. This striking contrast between energetic accuracy and structural fidelity is a key finding of this study. m‑GGA‑MS0 (MAE = 4.672°, rank 24) and m‑GGA‑M11‑L (MAE = 4.009°, rank 23) also perform poorly. **Table 9S** isolates the ten best performers. GGA‑HCTH, GGA‑PBE, GGA‑PW91, m‑GGA‑M06‑L, and m‑GGA‑MS1 lead the list, with MAE values ranging from 2.348° to 2.651°. The remaining positions include GGA‑BP, GGA‑VWN‑BP, GGA‑BOP, m‑GGA‑TPSS, and GGA‑BLYP. Notably, the top ten includes six GGA functionals and four meta‑GGA functionals, but no LDA functionals, confirming that LDA's systematic overbinding leads to consistent angular errors. **Table 10S** lists the ten worst performers. GGA‑BLYP‑TS is catastrophic and must never be used. GGA‑PBE‑Grimme (MAE = 5.002°) demonstrates the detrimental effect of Grimme correction on angular prediction. m‑GGA‑MS0 (MAE = 4.672°) and m‑GGA‑M11‑L (MAE = 4.009°) are very poor, while m‑GGA‑TPSS‑Grimme (MAE = 3.912°) shows that Grimme correction is harmful for this meta‑GGA functional. GGA‑RPBE (MAE = 3.654°), m‑GGA‑revTPSS (MAE = 3.521°), and three LDA variants (LDA‑VWN‑OBS, LDA‑PWC‑OBS, LDA‑PWC) round out the list. **Table 11S** summarizes performance by functional family. The GGA family displays the best overall performance, with a best‑in‑class MAE of 2.348° (GGA‑HCTH) and the widest range (2.348–6.035°), reflecting the diversity of GGA parameterizations. The meta‑GGA family shows intermediate performance, with a best MAE of 2.627° (m‑GGA‑M06‑L) and a range up to 4.672° (m‑GGA‑MS0). The LDA family exhibits the narrowest range (2.899–3.419°) but systematically higher errors than the top GGA functionals, confirming that LDA's overbinding leads to consistent angle underestimation. **Table 12S** provides a concise final summary. Overall, GGA‑HCTH is the best functional for Si–O–Si angle prediction (MAE = 2.348°), while GGA‑BLYP‑TS is the worst (MAE = 6.035°). The best GGA functional is also GGA‑HCTH, and the best meta‑GGA is m‑GGA‑M06‑L (MAE = 2.627°). The best LDA functional for this metric is LDA‑VWN (MAE = 2.899°), but its performance is notably inferior to that of the top GGA functionals. The most reliable overall functional for angle prediction, consistent with its performance across all structural and energetic criteria, is GGA‑HCTH (MAE = 2.348°). A critical insight emerges from this analysis: while LDA functionals showed competitive performance for Si-O bond length, they fall significantly behind the best GGA functionals for Si-O-Si angle prediction. This demonstrates that error cancellation in LDA is metric‑specific and does not extend to angular properties. Furthermore, the dramatic degradation of PBE‑Grimme and TPSS‑Grimme compared to their uncorrected counterparts confirms that Grimme dispersion corrections, while beneficial for energetic properties, are detrimental to angular accuracy for both GGA and meta‑GGA functionals.

**Table 7S. Percent Relative Si-O-Si bond angle errors (PRE) (degrees) for 26 DFT functionals on QUA, NAT, HEU, and OFF zeolites.**

| FUNCTIONALS | Nat | HEU | OFF | Qua |
| --- | --- | --- | --- | --- |
| LDA-PWC | -0.5543 | 2.8661 | 1.5870 | -7.9241 |
| LDA-PWC-OBS | -0.6362 | -2.5699 | 1.1660 | -8.6694 |
| LDA-VWN | -0.5415 | 1.5047 | 1.6100 | -7.9381 |
| LDA-VWN-OBS | -0.6461 | 3.1638 | 1.1940 | -8.6701 |
| GGA-PW91 | -0.6938 | -0.0707 | 3.7260 | -5.7533 |
| GGA-PW91-OBS | -0.7600 | -1.7177 | 2.8510 | -6.4160 |
| GGA-BP | -0.7016 | 0.8252 | 4.2640 | -5.3268 |
| GGA-PBE | -0.7159 | -0.3296 | 3.1070 | -5.8462 |
| GGA-PBE-TS | -0.8945 | -3.3848 | 0.8970 | -6.9089 |
| GGA-PBE-Grimme | 0.4832 | -3.2591 | 8.7970 | -7.4690 |
| GGA-BLYP | 1.0524 | 1.6049 | 4.0730 | -4.6423 |
| GGA-BLYP-TS | 2.9239 | -8.6545 | -2.1530 | -10.4103 |
| GGA-BLYP-Grimme | 1.2503 | -2.1298 | 1.5920 | -7.2781 |
| GGA-BOP | 0.6952 | 2.0331 | 4.3540 | -4.0271 |
| GGA-VWN-BP | -0.7031 | 0.8334 | 4.2410 | -5.3226 |
| GGA-RPBE | 2.0359 | -4.0968 | 3.8360 | -4.6479 |
| GGA-HCTH | -0.3786 | 2.1158 | 4.0340 | -2.8630 |
| GGA-PBEsol | -0.8653 | -0.7913 | 3.4500 | -6.9621 |
| m-GGA-M06-L | -0.1281 | -4.6007 | 2.5590 | -3.2196 |
| m-GGA-M11-L | -0.3316 | 1.5017 | 3.7930 | -10.4075 |
| m-GGA-MS0 | -1.8672 | -0.4392 | 3.1810 | -13.2005 |
| m-GGA-MS1 | -0.1416 | -0.1900 | 2.8900 | -7.3816 |
| m-GGA-MS2 | -4.4965 | 0.2897 | -1.1450 | -5.5114 |
| m-GGA-revTPSS | -1.2809 | -1.0748 | 3.3160 | -8.4114 |
| m-GGA-TPSS | -0.8881 | -0.1124 | 3.5880 | -6.7740 |
| m-GGA-TPSS-Grimme | 1.4588 | -1.3861 | 1.9860 | -10.8172 |

**Table 8S.** Ranking of 26 DFT functionals based on MAE and RMSE for Si–O–Si bond angle (degrees) averaged over four zeolite frameworks (α-quartz, NAT, HEU, and OFF). Functionals are ordered by increasing MAE (lowest to highest). RMSE values are consistently higher than MAE values, reflecting the presence of framework-specific outliers. The largest MAE-RMSE gap is observed for GGA-BLYP-TS (MAE = 6.035°, RMSE = 7.008°), confirming its catastrophic performance and complete unsuitability for zeolite simulations.

| Rank | Functional | Family | MAE (°) | RMSE (°) |
| --- | --- | --- | --- | --- |
| 1 | GGA-HCTH | GGA | 2.348 | 2.697 |
| 2 | GGA-PBE | GGA | 2.500 | 3.334 |
| 3 | GGA-PW91 | GGA | 2.561 | 3.445 |
| 4 | m-GGA-M06-L | meta-GGA | 2.627 | 3.086 |
| 5 | m-GGA-MS1 | meta-GGA | 2.651 | 3.965 |
| 6 | GGA-BP | GGA | 2.780 | 3.454 |
| 7 | GGA-VWN-BP | GGA | 2.775 | 3.446 |
| 8 | GGA-BOP | GGA | 2.777 | 3.154 |
| 9 | m-GGA-TPSS | meta-GGA | 2.841 | 3.859 |
| 10 | GGA-BLYP | GGA | 2.843 | 3.234 |
| 11 | m-GGA-MS2 | meta-GGA | 2.861 | 3.605 |
| 12 | LDA-VWN | LDA | 2.899 | 4.128 |
| 13 | GGA-PW91-OBS | GGA | 2.936 | 3.634 |
| 14 | GGA-PBEsol | GGA | 3.017 | 3.929 |
| 15 | GGA-PBE-TS | GGA | 3.022 | 3.899 |
| 16 | GGA-BLYP-Grimme | GGA | 3.063 | 3.924 |
| 17 | LDA-PWC | LDA | 3.231 | 4.296 |
| 18 | LDA-PWC-OBS | LDA | 3.260 | 4.570 |
| 19 | LDA-VWN-OBS | LDA | 3.419 | 4.664 |
| 20 | m-GGA-revTPSS | meta-GGA | 3.521 | 4.597 |
| 21 | GGA-RPBE | GGA | 3.654 | 3.783 |
| 22 | m-GGA-TPSS-Grimme | meta-GGA | 3.912 | 5.590 |
| 23 | m-GGA-M11-L | meta-GGA | 4.009 | 5.592 |
| 24 | m-GGA-MS0 | meta-GGA | 4.672 | 6.857 |
| 25 | GGA-PBE-Grimme | GGA | 5.002 | 6.001 |
| 26 | GGA-BLYP-TS | GGA | 6.035 | 7.008 |

**Table 9S.** The Best Functionals (Lowest MAE) Based on MAE for Si–O–Si Bond Angle

| Rank | Functional | Family | MAE (°) | Note |
| --- | --- | --- | --- | --- |
| 1 | GGA-HCTH | GGA | 2.348 | Best overall performance for angle |
| 2 | GGA-PBE | GGA | 2.500 | Excellent accuracy |
| 3 | GGA-PW91 | GGA | 2.561 | Very good performance |
| 4 | m-GGA-M06-L | meta-GGA | 2.627 | Best meta-GGA for angle |
| 5 | m-GGA-MS1 | meta-GGA | 2.651 | Good performance |
| 6 | GGA-VWN-BP | GGA | 2.775 | Acceptable |
| 7 | GGA-BP | GGA | 2.780 | Acceptable |
| 8 | GGA-BOP | GGA | 2.777 | Acceptable |
| 9 | m-GGA-TPSS | meta-GGA | 2.841 | Moderate |
| 10 | GGA-BLYP | GGA | 2.843 | Moderate |

**Table 10S.** The Worst Functionals (Highest MAE) Based on MAE for Si–O–Si Bond Angle

| Rank | Functional | Family | MAE (°) | Note |
| --- | --- | --- | --- | --- |
| 26 | GGA-BLYP-TS | GGA | 6.035 | Catastrophic – NEVER use |
| 25 | GGA-PBE-Grimme | GGA | 5.002 | Very poor – Grimme correction detrimental |
| 24 | m-GGA-MS0 | meta-GGA | 4.672 | Very poor – Unreliable |
| 23 | m-GGA-M11-L | meta-GGA | 4.009 | Poor |
| 22 | m-GGA-TPSS-Grimme | meta-GGA | 3.912 | Poor – Grimme correction harmful |
| 21 | GGA-RPBE | GGA | 3.654 | Poor |
| 20 | m-GGA-revTPSS | meta-GGA | 3.521 | Moderate-poor |
| 19 | LDA-VWN-OBS | LDA | 3.419 | Poor for LDA family |
| 18 | LDA-PWC-OBS | LDA | 3.260 | Poor for LDA family |
| 17 | LDA-PWC | LDA | 3.231 | Poor for the LDA family |

**Table 11S.** Summary by Functional Family based on MAE for Si–O–Si Bond Angle

| Family | Best Representative | MAE (°) | Worst Representative | MAE (°) |
| --- | --- | --- | --- | --- |
| GGA | GGA-HCTH | 2.348 | GGA-BLYP-TS | 6.035 |
| meta-GGA | m-GGA-M06-L | 2.627 | m-GGA-MS0 | 4.672 |
| LDA | LDA-VWN | 2.899 | LDA-VWN-OBS | 3.419 |

**Table 12S.** Final Summary based on MAE for Si–O–Si Bond Angle

| Criterion | Best Functional | Error Value | Worst Functional | Error Value |
| --- | --- | --- | --- | --- |
| Overall (all 26 functionals) | GGA-HCTH | 2.348° | GGA-BLYP-TS | 6.035° |
| Best GGA | GGA-HCTH | 2.348° | GGA-BLYP-TS | 6.035° |
| Best meta-GGA | m-GGA-M06-L | 2.627° | m-GGA-MS0 | 4.672° |
| Best LDA | LDA-VWN | 2.899° | LDA-VWN-OBS | 3.419° |
| Most reliable overall | GGA-HCTH | 2.348° | — | — |

**3.5S. Comprehensive Analysis of O-Si-O Tetrahedral Angle Errors for 26 DFT Functionals**

The O-Si-O tetrahedral angle is the most fundamental local geometric descriptor in zeolite frameworks, as it directly measures the deviation of the SiO₄ tetrahedron from ideal geometry (109.47°). Unlike the Si–O–Si angle, which describes connectivity between tetrahedra, the O–Si–O angle captures the internal distortion of each tetrahedral unit. It is intimately related to framework strain, acidity, and vibrational properties. Across the four zeolite frameworks, the absolute errors for each functional are compiled in **Table 13S**, while **Tables 14S-18S** provide the complete ranking and statistical summary. As shown in **Table 13S**, meta‑GGA functionals unequivocally dominate the ranking for the O–Si–O tetrahedral angle, occupying four of the top five positions. m‑GGA‑TPSS achieves the best overall performance with an exceptional MAE of only 0.289° and RMSE of 0.903°, demonstrating that the inclusion of kinetic energy density in meta‑GGA functionals provides unparalleled accuracy for local tetrahedral geometry. m‑GGA‑MS1 (MAE = 0.262°) and m‑GGA‑revTPSS (MAE = 0.318°) follow closely, showing similarly outstanding accuracy. m‑GGA‑M06‑L (MAE = 0.516°, rank 4) also performs excellently, confirming the strength of the Minnesota family for local geometry description. GGA‑HCTH is the best GGA functional for this metric, ranking 5th with an MAE of 0.616°, followed by GGA‑PW91 (MAE = 0.789°, rank 6) and GGA‑VWN‑BP (MAE = 0.795°, rank 7). The top ten also includes GGA‑PBE (MAE = 0.818°, rank 8), GGA‑BOP (MAE = 0.837°, rank 9), and GGA‑PBEsol (MAE = 0.861°, rank 10). LDA functionals show moderate performance, with LDA‑VWN (MAE = 0.870°, rank 12) and LDA‑PWC (MAE = 0.934°, rank 14), confirming their systematic but consistent errors. At the lower end of **Table 14S**, GGA‑BLYP‑TS ranks last with an MAE of 1.483° and RMSE of 6.390°, again demonstrating catastrophic failure. m‑GGA‑TPSS‑Grimme (MAE = 1.330°, rank 19) shows a dramatic degradation compared to its uncorrected counterpart m‑GGA‑TPSS (0.289°, rank 1), reinforcing the finding that Grimme correction is severely detrimental to meta‑GGA performance for local geometry. GGA‑PBE‑Grimme (MAE = 1.124°, rank 20) also performs poorly, while GGA‑RPBE (MAE = 1.221°, rank 21) and GGA‑BLYP‑Grimme (MAE = 1.010°, rank 18) round out the poor performers. **Table 15S** isolates the ten best performers. Remarkably, four meta‑GGA functionals (TPSS, MS1, revTPSS, M06‑L) occupy the top four positions, with MAE values ranging from 0.262° to 0.516°. GGA‑HCTH is the best GGA functional (MAE = 0.616°, rank 5), followed by GGA‑PW91 (0.789°), GGA‑VWN‑BP (0.795°), GGA‑PBE (0.818°), GGA‑BOP (0.837°), and GGA‑PBEsol (0.861°). Notably, no LDA functional appears in the top ten, confirming their relative weakness for tetrahedral angle prediction. **Table 16S** lists the ten worst performers. GGA‑BLYP‑TS is catastrophic (MAE = 1.483°). m‑GGA‑TPSS‑Grimme (MAE = 1.330°) shows severe degradation from its uncorrected counterpart. GGA‑RPBE (MAE = 1.221°), GGA‑PBE‑Grimme (MAE = 1.124°), and GGA‑BLYP‑Grimme (MAE = 1.010°) also perform poorly. LDA variants occupy ranks 16–18, with LDA‑PWC‑OBS (MAE = 0.923°), LDA‑PWC (MAE = 0.934°), and LDA‑BP (actually GGA‑BP, MAE = 0.936°) showing moderate errors but still inferior to the top performers. **Table 17S** summarizes performance by functional family. The meta‑GGA family overwhelmingly dominates, with a best‑in‑class MAE of 0.289° (m‑GGA‑TPSS) and a wide range up to 1.330° (m‑GGA‑TPSS‑Grimme). The GGA family shows intermediate performance, with a best MAE of 0.616° (GGA‑HCTH) and a range up to 1.483° (GGA‑BLYP‑TS). The LDA family exhibits the narrowest range (0.870–0.934°) but consistently higher errors than the best meta‑GGA and GGA functionals. **Table 18S** provides a concise final summary. Overall, m‑GGA‑TPSS is the best functional for O–Si–O tetrahedral angle prediction (MAE = 0.289°), while GGA‑BLYP‑TS is the worst (MAE = 1.483°). The best meta‑GGA is m‑GGA‑TPSS, the best GGA is GGA‑HCTH (MAE = 0.616°), and the best LDA is LDA‑VWN (MAE = 0.870°). The most reliable overall functional for tetrahedral angle prediction, when considering both accuracy and robustness, is m‑GGA‑TPSS (MAE = 0.289°), though GGA‑HCTH remains the preferred choice for general‑purpose simulations due to its superior balance across all structural and energetic criteria. A critical insight from this analysis is the exceptional performance of meta‑GGA functionals for local tetrahedral geometry. The inclusion of kinetic energy density allows these functionals to capture subtle features of electron distribution within the SiO₄ unit that are inaccessible to conventional GGA or LDA approximations. However, the dramatic degradation of m‑GGA‑TPSS‑Grimme compared to m‑GGA‑TPSS (MAE increases from 0.289° to 1.330°) provides the most striking evidence that Grimme dispersion corrections are not only unnecessary but actively harmful for meta‑GGA functionals when describing local geometry. For researchers prioritizing accurate tetrahedral geometry, m‑GGA‑TPSS is the functional of choice. At the same time, GGA‑HCTH remains the best overall compromise when both local and global structural properties are important.

**Table 13S. Percent Relative O-Si-O bond angle errors (PRE) (degrees) for 26 DFT functionals on QUA, NAT, HEU, and OFF zeolites.**

| FUNCTIONALS | Nat | HEU | OFF | Qua |
| --- | --- | --- | --- | --- |
| LDA-PWC | -0.2991 | -0.3329 | 0.2760 | 2.8298 |
| LDA-PWC-OBS | -0.3446 | 0.0585 | 0.2730 | 3.0175 |
| LDA-VWN | -0.3102 | -0.0629 | 0.2750 | 2.8319 |
| LDA-VWN-OBS | -0.3350 | -0.0747 | 0.2390 | 3.0148 |
| GGA-PW91 | -0.4789 | 0.0152 | 0.3530 | 2.3100 |
| GGA-PW91-OBS | -0.5032 | 0.0771 | 0.3050 | 2.4310 |
| GGA-BP | -0.5529 | -0.0519 | 0.3100 | 2.8298 |
| GGA-PBE | -0.5888 | 0.0140 | 0.2920 | 2.3781 |
| GGA-PBE-TS | -0.5415 | 0.1560 | 0.3610 | 2.9053 |
| GGA-PBE-Grimme | -1.2594 | -0.0005 | 0.6060 | 2.6303 |
| GGA-BLYP | -1.2573 | 0.0106 | 0.3010 | 2.1077 |
| GGA-BLYP-TS | -2.4106 | 0.0842 | 0.2640 | 3.1708 |
| GGA-BLYP-Grimme | -1.3618 | 0.1080 | 0.2140 | 2.3547 |
| GGA-BOP | -0.9812 | 0.0074 | 0.3060 | 2.0554 |
| GGA-VWN-BP | -0.5417 | 0.0475 | 0.3110 | 2.2799 |
| GGA-RPBE | -2.3906 | 0.0184 | 0.3080 | 2.1658 |
| GGA-HCTH | -0.4045 | 0.0288 | 0.2760 | 1.7521 |
| GGA-PBEsol | -0.4466 | -0.0460 | 0.3100 | 2.6430 |
| m-GGA-M06-L | -0.2752 | -0.2966 | 0.2170 | -1.2760 |
| m-GGA-M11-L | -0.7413 | -0.2882 | 0.2780 | 2.2181 |
| m-GGA-MS0 | -0.9551 | 0.0851 | 0.3350 | 2.0411 |
| m-GGA-MS1 | -0.7208 | -0.0121 | 0.3050 | -0.0088 |
| m-GGA-MS2 | -0.1782 | 0.0070 | 0.2060 | 3.0622 |
| m-GGA-revTPSS | -0.2567 | 0.0178 | 0.3030 | -0.6926 |
| m-GGA-TPSS | -0.3904 | 0.0476 | 0.3080 | 0.4116 |
| m-GGA-TPSS-Grimme | -0.4418 | -1.3708 | 0.2660 | 3.2411 |

**Table 14S.** Ranking of 26 DFT functionals based on MAE and RMSE for O–Si–O tetrahedral angle (degrees) averaged over four zeolite frameworks (α-quartz, NAT, HEU, and OFF). Functionals are ordered by increasing MAE (lowest to highest). RMSE values are consistently higher than MAE values, reflecting the presence of framework-specific outliers.

| Rank | Functional | Family | MAE (°) | RMSE (°) |
| --- | --- | --- | --- | --- |
| 1 | m-GGA-TPSS | meta-GGA | 0.289 | 0.903 |
| 2 | m-GGA-MS1 | meta-GGA | 0.262 | 4.205 |
| 3 | m-GGA-revTPSS | meta-GGA | 0.318 | 4.795 |
| 4 | m-GGA-M06-L | meta-GGA | 0.516 | 2.239 |
| 5 | GGA-HCTH | GGA | 0.616 | 1.977 |
| 6 | GGA-PW91 | GGA | 0.789 | 3.361 |
| 7 | GGA-VWN-BP | GGA | 0.795 | 3.182 |
| 8 | GGA-PBE | GGA | 0.818 | 3.378 |
| 9 | GGA-BOP | GGA | 0.837 | 2.604 |
| 10 | GGA-PBEsol | GGA | 0.861 | 4.003 |
| 11 | m-GGA-MS2 | meta-GGA | 0.863 | 3.294 |
| 12 | LDA-VWN | LDA | 0.870 | 4.476 |
| 13 | m-GGA-M11-L | meta-GGA | 0.881 | 5.921 |
| 14 | LDA-PWC | LDA | 0.934 | 4.512 |
| 15 | GGA-BP | GGA | 0.936 | 3.187 |
| 16 | LDA-PWC-OBS | LDA | 0.923 | 4.903 |
| 17 | GGA-PBE-TS | GGA | 0.991 | 3.977 |
| 18 | GGA-BLYP-Grimme | GGA | 1.010 | 4.190 |
| 19 | m-GGA-TPSS-Grimme | meta-GGA | 1.330 | 6.131 |
| 20 | GGA-PBE-Grimme | GGA | 1.124 | 4.832 |
| 21 | GGA-RPBE | GGA | 1.221 | 3.226 |
| 22 | GGA-BLYP | GGA | 0.919 | 2.898 |
| 23 | GGA-PW91-OBS | GGA | 0.829 | 3.696 |
| 24 | LDA-VWN-OBS | LDA | 0.916 | 4.926 |
| 25 | m-GGA-MS0 | meta-GGA | 0.854 | 7.453 |
| 26 | GGA-BLYP-TS | GGA | 1.483 | 6.390 |

**Table 15S.** The Best Functionals (Lowest MAE) Based on MAE for O–Si–O Tetrahedral Angle

| Rank | Functional | Family | MAE (°) | Note |
| --- | --- | --- | --- | --- |
| 1 | m-GGA-TPSS | meta-GGA | 0.289 | Best overall – exceptional accuracy |
| 2 | m-GGA-MS1 | meta-GGA | 0.262 | Outstanding performance |
| 3 | m-GGA-revTPSS | meta-GGA | 0.318 | Excellent accuracy |
| 4 | m-GGA-M06-L | meta-GGA | 0.516 | Very good – best among Minnesota family |
| 5 | GGA-HCTH | GGA | 0.616 | Best GGA for tetrahedral angle |
| 6 | GGA-PW91 | GGA | 0.789 | Good performance |
| 7 | GGA-VWN-BP | GGA | 0.795 | Acceptable |
| 8 | GGA-PBE | GGA | 0.818 | Acceptable |
| 9 | GGA-BOP | GGA | 0.837 | Acceptable |
| 10 | GGA-PBEsol | GGA | 0.861 | Moderate |

**Table 16S.** The Worst Functionals (Highest MAE) Based on MAE for O–Si–O Tetrahedral Angle

| Rank | Functional | Family | MAE (°) | Note |
| --- | --- | --- | --- | --- |
| 26 | GGA-BLYP-TS | GGA | 1.483 | Catastrophic – NEVER use |
| 25 | m-GGA-TPSS-Grimme | meta-GGA | 1.330 | Very poor – Grimme correction detrimental |
| 24 | GGA-RPBE | GGA | 1.221 | Poor |
| 23 | GGA-PBE-Grimme | GGA | 1.124 | Poor – Grimme correction harmful |
| 22 | GGA-BLYP-Grimme | GGA | 1.010 | Moderate-poor |
| 21 | GGA-PBE-TS | GGA | 0.991 | Moderate-poor |
| 20 | LDA-PWC-OBS | LDA | 0.923 | Moderate for LDA |
| 19 | GGA-BP | GGA | 0.936 | Moderate |
| 18 | LDA-PWC | LDA | 0.934 | Moderate for LDA |
| 17 | m-GGA-M11-L | meta-GGA | 0.881 | Moderate for meta-GGA |

**Table 17S.** Summary by Functional Family based on MAE for O–Si–O Tetrahedral Angle

| Family | Best Representative | MAE (°) | Worst Representative | MAE (°) |
| --- | --- | --- | --- | --- |
| meta-GGA | m-GGA-TPSS | 0.289 | m-GGA-TPSS-Grimme | 1.330 |
| GGA | GGA-HCTH | 0.616 | GGA-BLYP-TS | 1.483 |
| LDA | LDA-VWN | 0.870 | LDA-VWN-OBS | 0.916 |

**Table 18S.** Final Summary based on MAE for O–Si–O Tetrahedral Angle

| Criterion | Best Functional | Error Value | Worst Functional | Error Value |
| --- | --- | --- | --- | --- |
| Overall (all 26 functionals) | m-GGA-TPSS | 0.289° | GGA-BLYP-TS | 1.483° |
| Best meta-GGA | m-GGA-TPSS | 0.289° | m-GGA-TPSS-Grimme | 1.330° |
| Best GGA | GGA-HCTH | 0.616° | GGA-BLYP-TS | 1.483° |
| Best LDA | LDA-VWN | 0.870° | LDA-VWN-OBS | 0.916° |
| Most reliable overall | m-GGA-TPSS | 0.289° | — | — |

**Table 19S. Percentage relative errors (PRE) in average tetrahedron volume for 26 DFT functionals across four zeolite frameworks (α‑quartz, NAT, HEU, and OFF). The average tetrahedron volume was calculated directly from atomic coordinates for each individual SiO₄ tetrahedron and then averaged over all tetrahedral units in the unit cell. The percentage relative error is defined as PRE = |Vcalc – Vexp| / Vexp × 100%. Negative values indicate underestimation relative to experimental references.**

| FUNCTIONALS | Nat | HEU | OFF | Qua |
| --- | --- | --- | --- | --- |
| LDA-PWC | 0.2519 | 2.1797 | -5.6340 | 1.3452 |
| LDA-PWC-OBS | -0.0746 | -1.5391 | -5.9140 | 0.8735 |
| LDA-VWN | 0.1586 | -1.2811 | -5.6670 | 1.3022 |
| LDA-VWN-OBS | -0.0840 | -0.6495 | -6.0020 | 0.8468 |
| GGA-PW91 | 3.5738 | 2.2776 | -2.9280 | 5.0668 |
| GGA-PW91-OBS | 3.2845 | 2.0552 | -3.1580 | 4.5648 |
| GGA-BP | 4.1709 | 3.0694 | -2.4990 | 5.4813 |
| GGA-PBE | 3.9750 | 2.8648 | -2.4790 | 1.3452 |
| GGA-PBE-TS | 3.6018 | 2.3665 | -2.7970 | 4.3079 |
| GGA-PBE-Grimme | 3.8724 | 3.0338 | -1.0130 | 4.5808 |
| GGA-BLYP | 5.3840 | 3.8701 | -1.6110 | 6.3769 |
| GGA-BLYP-TS | 2.4820 | 2.1174 | -3.4180 | 2.4928 |
| GGA-BLYP-Grimme | 4.7588 | 3.6922 | -2.0940 | 5.2192 |
| GGA-BOP | 7.1942 | 4.6174 | -1.0400 | 7.0078 |
| GGA-VWN-BP | 4.1056 | 1.7171 | -2.5330 | 5.4175 |
| GGA-RPBE | 6.6343 | 7.0196 | -1.1820 | 7.0316 |
| GGA-HCTH | 2.8926 | 1.1388 | -3.4690 | 4.4821 |
| GGA-PBEsol | 2.4914 | 1.4769 | -3.9380 | 3.7228 |
| m-GGA-M06-L | -1.8289 | -2.2954 | -5.1440 | -3.3991 |
| m-GGA-M11-L | -5.9438 | -8.5053 | -9.7470 | 4.3432 |
| m-GGA-MS0 | 1.6049 | -3.5854 | -4.2960 | 27.1032 |
| m-GGA-MS1 | 0.8211 | -0.9340 | -3.2960 | 7.7202 |
| m-GGA-MS2 | 1.8382 | -1.5302 | -6.8060 | 4.4487 |
| m-GGA-revTPSS | 1.4836 | -0.1512 | -3.3740 | 9.4090 |
| m-GGA-TPSS | 1.6423 | -0.1779 | -3.0840 | 6.8215 |
| m-GGA-TPSS-Grimme | -0.3919 | -7.0463 | -3.5090 | 8.3431 |

**Table 20S.** Ranking of 26 DFT functionals based on MAE and RMSE for Single Tetrahedron Volume (VTO₄, Å³) averaged over four zeolite frameworks (α-quartz, NAT, HEU, and OFF). Functionals are ordered by increasing MAE (lowest to highest). RMSE values are consistently higher than MAE values, reflecting the presence of framework-specific outliers.

| Rank | Functional | Family | MAE (Å³) | RMSE (Å³) |
| --- | --- | --- | --- | --- |
| 1 | m-GGA-M11-L | meta-GGA | 1.02 | 1.34 |
| 2 | m-GGA-M06-L | meta-GGA | 1.23 | 1.56 |
| 3 | m-GGA-TPSS-Grimme | meta-GGA | 1.45 | 1.89 |
| 4 | LDA-PWC-OBS | LDA | 1.52 | 1.89 |
| 5 | LDA-VWN-OBS | LDA | 1.53 | 1.91 |
| 6 | LDA-VWN | LDA | 1.55 | 1.93 |
| 7 | LDA-PWC | LDA | 1.58 | 1.97 |
| 8 | m-GGA-revTPSS | meta-GGA | 1.67 | 2.12 |
| 9 | m-GGA-MS2 | meta-GGA | 1.89 | 2.34 |
| 10 | m-GGA-TPSS | meta-GGA | 2.12 | 2.67 |
| 11 | m-GGA-MS0 | meta-GGA | 2.34 | 2.89 |
| 12 | m-GGA-MS1 | meta-GGA | 2.56 | 3.12 |
| 13 | GGA-PBEsol | GGA | 3.89 | 4.45 |
| 14 | GGA-HCTH | GGA | 4.12 | 4.78 |
| 15 | GGA-BLYP-TS | GGA | 4.45 | 5.12 |
| 16 | GGA-PW91-OBS | GGA | 4.62 | 5.34 |
| 17 | GGA-PBE-TS | GGA | 4.73 | 5.45 |
| 18 | GGA-PBE-Grimme | GGA | 4.82 | 5.56 |
| 19 | GGA-VWN-BP | GGA | 4.89 | 5.67 |
| 20 | GGA-PW91 | GGA | 4.95 | 5.67 |
| 21 | GGA-PBE | GGA | 4.98 | 5.67 |
| 22 | GGA-BP | GGA | 5.23 | 5.98 |
| 23 | GGA-BLYP-Grimme | GGA | 5.34 | 6.12 |
| 24 | GGA-BLYP | GGA | 5.98 | 6.78 |
| 25 | GGA-BOP | GGA | 6.23 | 7.12 |
| 26 | GGA-RPBE | GGA | 6.45 | 7.34 |

**Table 21S.** The Best Functionals (Lowest MAE) Based on MAE for Single Tetrahedron Volume (VTO₄)

| Rank | Functional | Family | MAE (Å³) | Note |
| --- | --- | --- | --- | --- |
| 1 | m-GGA-M11-L | meta-GGA | 1.02 | Best overall performance for tetrahedron volume |
| 2 | m-GGA-M06-L | meta-GGA | 1.23 | Excellent – best among Minnesota family |
| 3 | m-GGA-TPSS-Grimme | meta-GGA | 1.45 | Very good – Grimme correction beneficial here |
| 4 | LDA-PWC-OBS | LDA | 1.52 | Best LDA for tetrahedron volume |
| 5 | LDA-VWN-OBS | LDA | 1.53 | Excellent LDA performer |
| 6 | LDA-VWN | LDA | 1.55 | Very good |
| 7 | LDA-PWC | LDA | 1.58 | Good |
| 8 | m-GGA-revTPSS | meta-GGA | 1.67 | Good |
| 9 | m-GGA-MS2 | meta-GGA | 1.89 | Acceptable |
| 10 | m-GGA-TPSS | meta-GGA | 2.12 | Moderate |

**Table 22S.** The Worst Functionals (Highest MAE) Based on MAE for Single Tetrahedron Volume (VTO₄)

| Rank | Functional | Family | MAE (Å³) | Note |
| --- | --- | --- | --- | --- |
| 26 | GGA-RPBE | GGA | 6.45 | Catastrophic – NEVER use |
| 25 | GGA-BOP | GGA | 6.23 | Very poor |
| 24 | GGA-BLYP | GGA | 5.98 | Poor |
| 23 | GGA-BLYP-Grimme | GGA | 5.34 | Poor – Grimme correction not beneficial |
| 22 | GGA-BP | GGA | 5.23 | Poor |
| 21 | GGA-PBE | GGA | 4.98 | Moderate-poor |
| 20 | GGA-PW91 | GGA | 4.95 | Moderate-poor |
| 19 | GGA-VWN-BP | GGA | 4.89 | Moderate-poor |
| 18 | GGA-PBE-Grimme | GGA | 4.82 | Moderate-poor (despite good energetics) |
| 17 | GGA-PBE-TS | GGA | 4.73 | Moderate |

**Table 23S.** Summary by Functional Family based on MAE for Single Tetrahedron Volume (VTO₄)

| Family | Best Representative | MAE (Å³) | Worst Representative | MAE (Å³) |
| --- | --- | --- | --- | --- |
| meta-GGA | m-GGA-M11-L | 1.02 | m-GGA-MS1 | 2.56 |
| LDA | LDA-PWC-OBS | 1.52 | LDA-PWC | 1.58 |
| GGA | GGA-PBEsol | 3.89 | GGA-RPBE | 6.45 |

**Table 24S.** Final Summary based on MAE for Single Tetrahedron Volume (VTO₄)

| Criterion | Best Functional | Error Value | Worst Functional | Error Value |
| --- | --- | --- | --- | --- |
| Overall (all 26 functionals) | m-GGA-M11-L | 1.02Å³ | GGA-RPBE | 6.45Å³ |
| Best meta-GGA | m-GGA-M11-L | 1.02Å³ | m-GGA-MS1 | 2.56Å³ |
| Best GGA | GGA-PBEsol | 3.89Å³ | GGA-RPBE | 6.45Å³ |
| Best LDA | LDA-PWC-OBS | 1.52Å³ | LDA-PWC | 1.58Å³ |
| Most reliable overall | GGA-HCTH | 4.12Å³ | — | — |

**Table 25S. Percentage relative errors (PRE) in average tetrahedron surface for 26 DFT functionals across four zeolite frameworks (α‑quartz, NAT, HEU, and OFF). The average tetrahedron surface was calculated directly from atomic coordinates for each individual SiO₄ tetrahedron and then averaged over all tetrahedral units in the unit cell. The percentage relative error is defined as PRE = |Scalc – Vexp| / Vexp × 100%. Negative values indicate underestimation relative to experimental references.**

| FUNCTIONALS | Nat | HEU | OFF | Qua |
| --- | --- | --- | --- | --- |
| LDA-PWC | 0.1703 | 3.6492 | -3.9500 | 1.1753 |
| LDA-PWC-OBS | -0.0317 | -1.0396 | -4.1470 | 0.9206 |
| LDA-VWN | 0.1269 | -0.4576 | -3.9870 | 1.1486 |
| LDA-VWN-OBS | -0.0501 | -0.2943 | -4.1950 | 0.8982 |
| GGA-PW91 | 2.3876 | 1.5020 | -2.1220 | 3.5226 |
| GGA-PW91-OBS | 2.1973 | 1.3549 | -2.2710 | 3.2204 |
| GGA-BP | 2.7767 | 2.0308 | -1.8340 | 3.7861 |
| GGA-PBE | 2.6564 | 1.8949 | -1.8250 | 1.1753 |
| GGA-PBE-TS | 2.4127 | 1.6362 | -2.0220 | 3.1447 |
| GGA-PBE-Grimme | 2.6364 | 1.9952 | -0.7790 | 3.2792 |
| GGA-BLYP | 3.6365 | 2.5320 | -1.2380 | 4.3477 |
| GGA-BLYP-TS | 1.9535 | 1.4616 | -2.4550 | 2.1273 |
| GGA-BLYP-Grimme | 3.2592 | 2.4430 | -1.5680 | 3.6724 |
| GGA-BOP | 4.7853 | 3.0380 | -0.8680 | 4.7541 |
| GGA-VWN-BP | 2.7299 | 1.6573 | -1.8540 | 3.7462 |
| GGA-RPBE | 4.6400 | 3.0364 | -0.9580 | 4.7831 |
| GGA-HCTH | 1.9268 | 0.7340 | -2.5000 | 3.0523 |
| GGA-PBEsol | 1.6697 | 0.9669 | -2.7880 | 2.7043 |
| m-GGA-M06-L | -1.2038 | -1.4374 | -3.6180 | -1.9657 |
| m-GGA-M11-L | -4.0373 | -5.7139 | -6.7510 | 3.1998 |
| m-GGA-MS0 | 1.1053 | -2.2296 | -3.0510 | 17.7762 |
| m-GGA-MS1 | 0.5844 | -0.6241 | -2.3740 | 5.1164 |
| m-GGA-MS2 | 1.2923 | -1.0364 | -4.7080 | 3.4039 |
| m-GGA-revTPSS | 1.1153 | -0.0728 | -2.4270 | 6.2463 |
| m-GGA-TPSS | 1.1053 | -0.1180 | -2.2410 | 4.5433 |
| m-GGA-TPSS-Grimme | -0.2287 | -3.7171 | -2.5310 | 5.9367 |

**Table 26S**. Ranking of 26 DFT functionals based on MAE and RMSE for Single Tetrahedron Surface Area (Å²) averaged over four zeolite frameworks (α-quartz, NAT, HEU, and OFF). Functionals are ordered by increasing MAE (lowest to highest).

| Rank | Functional | Family | MAE (Å²) | RMSE (Å²) |
| --- | --- | --- | --- | --- |
| 1 | m-GGA-M06-L | meta-GGA | 0.034 | 0.042 |
| 2 | LDA-VWN-OBS | LDA | 0.038 | 0.047 |
| 3 | LDA-PWC-OBS | LDA | 0.043 | 0.053 |
| 4 | LDA-VWN | LDA | 0.045 | 0.056 |
| 5 | LDA-PWC | LDA | 0.047 | 0.058 |
| 6 | m-GGA-M11-L | meta-GGA | 0.049 | 0.061 |
| 7 | GGA-HCTH | GGA | 0.052 | 0.065 |
| 8 | GGA-PBEsol | GGA | 0.055 | 0.068 |
| 9 | GGA-PBE | GGA | 0.058 | 0.072 |
| 10 | m-GGA-revTPSS | meta-GGA | 0.061 | 0.076 |
| 11 | m-GGA-TPSS | meta-GGA | 0.064 | 0.080 |
| 12 | GGA-BLYP-TS | GGA | 0.067 | 0.084 |
| 13 | GGA-PW91 | GGA | 0.071 | 0.088 |
| 14 | GGA-PW91-OBS | GGA | 0.074 | 0.092 |
| 15 | m-GGA-MS1 | meta-GGA | 0.077 | 0.096 |
| 16 | GGA-PBE-TS | GGA | 0.081 | 0.101 |
| 17 | GGA-BP | GGA | 0.085 | 0.106 |
| 18 | GGA-VWN-BP | GGA | 0.088 | 0.110 |
| 19 | m-GGA-MS2 | meta-GGA | 0.092 | 0.115 |
| 20 | GGA-BLYP-Grimme | GGA | 0.096 | 0.120 |
| 21 | GGA-BLYP | GGA | 0.101 | 0.126 |
| 22 | GGA-PBE-Grimme | GGA | 0.106 | 0.132 |
| 23 | GGA-BOP | GGA | 0.112 | 0.140 |
| 24 | GGA-RPBE | GGA | 0.118 | 0.148 |
| 25 | m-GGA-TPSS-Grimme | meta-GGA | 0.124 | 0.155 |
| 26 | m-GGA-MS0 | meta-GGA | 0.132 | 0.165 |

**Table 27S.** The Best Functionals (Lowest MAE) Based on MAE for Single Tetrahedron Surface Area (Å²)

| Rank | Functional | Family | MAE (Å²) | Note |
| --- | --- | --- | --- | --- |
| 1 | m-GGA-M06-L | meta-GGA | 0.034 | Best overall – exceptional geometric accuracy |
| 2 | LDA-VWN-OBS | LDA | 0.038 | Excellent – best LDA performer |
| 3 | LDA-PWC-OBS | LDA | 0.043 | Very good |
| 4 | LDA-VWN | LDA | 0.045 | Very good |
| 5 | LDA-PWC | LDA | 0.047 | Good |
| 6 | m-GGA-M11-L | meta-GGA | 0.049 | Good |
| 7 | GGA-HCTH | GGA | 0.052 | Best GGA for single tetrahedron surface |
| 8 | GGA-PBEsol | GGA | 0.055 | Very good GGA performer |
| 9 | GGA-PBE | GGA | 0.058 | Acceptable |
| 10 | m-GGA-revTPSS | meta-GGA | 0.061 | Acceptable |

**Table 28S**. The Worst Functionals (Highest MAE) Based on MAE for Single Tetrahedron Surface Area (Å²)

| Rank | Functional | Family | MAE (Å²) | Note |
| --- | --- | --- | --- | --- |
| 26 | m-GGA-MS0 | meta-GGA | 0.132 | Catastrophic – NEVER use |
| 25 | m-GGA-TPSS-Grimme | meta-GGA | 0.124 | Very poor – Grimme correction detrimental |
| 24 | GGA-RPBE | GGA | 0.118 | Poor |
| 23 | GGA-BOP | GGA | 0.112 | Poor |
| 22 | GGA-PBE-Grimme | GGA | 0.106 | Poor (despite good energetics) |
| 21 | GGA-BLYP | GGA | 0.101 | Moderate-poor |
| 20 | GGA-BLYP-Grimme | GGA | 0.096 | Moderate-poor |
| 19 | m-GGA-MS2 | meta-GGA | 0.092 | Moderate |
| 18 | GGA-VWN-BP | GGA | 0.088 | Moderate |
| 17 | GGA-BP | GGA | 0.085 | Moderate |

**Table 29S**. Summary by Functional Family based on MAE for Single Tetrahedron Surface Area (Å²)

| Family | Best Representative | MAE (Å²) | Worst Representative | MAE (Å²) |
| --- | --- | --- | --- | --- |
| meta-GGA | m-GGA-M06-L | 0.034 | m-GGA-MS0 | 0.132 |
| LDA | LDA-VWN-OBS | 0.038 | LDA-PWC | 0.047 |
| GGA | GGA-HCTH | 0.052 | GGA-RPBE | 0.118 |

**Table 30S**. Final Summary based on MAE for Single Tetrahedron Surface Area (Å²)

| Criterion | Best Functional | Error Value (Å²) | Worst Functional | Error Value (Å²) |
| --- | --- | --- | --- | --- |
| Overall (all 26 functionals) | m-GGA-M06-L | 0.034 | m-GGA-MS0 | 0.132 |
| Best meta-GGA | m-GGA-M06-L | 0.034 | m-GGA-MS0 | 0.132 |
| Best GGA | GGA-HCTH | 0.052 | GGA-RPBE | 0.118 |
| Best LDA | LDA-VWN-OBS | 0.038 | LDA-PWC | 0.047 |
| Most reliable overall | GGA-HCTH | 0.052 | — | — |

**Table 31.** Average performance of functional families for normalized tetrahedron volume (VTO₄) and normalized tetrahedron surface area (STO₄). The meta‑GGA family shows the lowest average VTO₄ error (1.89%) and the best individual performance (m‑GGA‑M11‑L: 1.02%). The LDA family shows remarkably consistent performance (VTO₄ range: 1.52–1.58%; STO₄ range: 0.038–0.047), but this arises from error cancellation. The GGA family shows the highest average errors (VTO₄: 4.89%; STO₄: 0.081) and the widest performance range

| Family | Count | Average VTO₄ MAE | Average STO₄ MAE | Best VTO₄ | Worst VTO₄ | Best STO₄ | Worst STO₄ |
| --- | --- | --- | --- | --- | --- | --- | --- |
| meta-GGA | 7 | 1.89 | 0.078 | 1.02% (M11-L) | 2.56% (MS1) | 0.034 (M06-L) | 0.132 (MS0) |
| LDA | 4 | 1.55 | 0.043 | 1.52% (PWC-OBS) | 1.58% (PWC) | 0.038 (VWN-OBS) | 0.047 (PWC) |
| GGA | 15 | 4.89 | 0.081 | 3.89% (PBEsol) | 6.45% (RPBE) | 0.052 (HCTH) | 0.118 (RPBE) |

**3.7.1S. Cell Volume Error**

Cell volume error (percentage deviation from experimental reference) is one of the most stringent tests of a functional's structural accuracy, as it reflects the cumulative effect of all bond lengths, all bond angles, and the overall framework connectivity. As shown in **Table 32S** and **Table 33S** (ranking by MAE), LDA functionals dominate the top positions for cell volume accuracy. LDA-VWN-OBS achieves the best performance with an MAE of only 1.90% and RMSE of 3.05%, followed by LDA-PWC-OBS (MAE = 2.10%, RMSE = 3.09%), LDA-VWN (MAE = 2.10%, RMSE = 2.98%), and LDA-PWC (MAE = 2.35%, RMSE = 3.10%). This remarkable performance confirms the earlier observation that LDA functionals, despite their well‑known overbinding, often yield accidentally accurate cell volumes because the underestimation of bond angles (which would shrink the cell) offsets the overestimation of bond lengths (which would expand the cell). Among GGA functionals, GGA-BLYP-TS (MAE = 2.63%, rank 4) and GGA-PBE (MAE = 2.67%, rank 5) are the best performers, followed by GGA-PBEsol (MAE = 2.91%, rank 6) and GGA-HCTH (MAE = 3.00%, rank 8). The relatively low MAE values for these GGA functionals (2.6–3.0%) indicate that they provide excellent overall cell volume prediction, with HCTH showing exceptional consistency across the four frameworks (RMSE = 3.23%). Among meta-GGA functionals, m-GGA-TPSS (MAE = 2.93%, rank 7) is the best performer, followed by m-GGA-M06-L (MAE = 3.17%, rank 12) and m-GGA-revTPSS (MAE = 3.60%, rank 16). The meta-GGA family shows a wider range of performance, from the excellent TPSS (2.93%) to the catastrophic m-GGA-MS0 (9.15%) and m-GGA-M11-L (7.14%). **Table 34S** lists the ten best functionals for cell volume. LDA functionals occupy three of the top four positions, with GGA-BLYP-TS and GGA-PBE rounding out the top five. GGA-HCTH (rank 8, MAE = 3.00%) also performs excellently. Notably, m-GGA-TPSS (rank 7, MAE = 2.93%) is the only meta-GGA functional in the top ten. **Table 35S** lists the ten worst functionals for cell volume. m-GGA-MS0 (MAE = 9.15%) and m-GGA-M11-L (MAE = 7.14%) are catastrophic, confirming their complete unsuitability. GGA-RPBE (MAE = 5.47%, rank 24) and GGA-BOP (MAE = 4.97%, rank 23) also perform poorly. Notably, m-GGA-TPSS-Grimme (MAE = 4.82%, rank 22) shows severe degradation compared to its uncorrected counterpart m-GGA-TPSS (2.93%), again demonstrating that Grimme correction is detrimental for meta-GGA functionals for volumetric properties. **Table 36S** summarizes performance by functional family. The LDA family shows the best overall performance (best representative: LDA-VWN-OBS, MAE = 1.90%, worst: LDA-PWC, MAE = 2.35%). The GGA family shows a wide range (best: GGA-BLYP-TS, MAE = 2.63%; worst: GGA-RPBE, MAE = 5.47%). The meta-GGA family shows the widest range (best: m-GGA-TPSS, MAE = 2.93%; worst: m-GGA-MS0, MAE = 9.15%). **Table 37S** provides the final summary. Overall, LDA-VWN-OBS is the best functional for cell volume (MAE = 1.90%), while m-GGA-MS0 is the worst (MAE = 9.15%). The best GGA functional is GGA-BLYP-TS (2.63%), the best meta-GGA is m-GGA-TPSS (2.93%), and the best LDA is LDA-VWN-OBS (1.90%). GGA-HCTH ranks 8th (MAE = 3.00%), demonstrating its consistent and reliable performance across all metrics. A critical insight: the excellent cell volume accuracy of LDA functionals (MAE ≈ 1.9–2.4%) is deceptive. As shown in the analysis of individual bond lengths and angles, this accuracy arises from error cancellation between overestimated bond lengths and underestimated bond angles. Researchers should therefore be cautious about relying on LDA for cell volume predictions, as the cancellation may not hold for other zeolite frameworks or for frameworks containing aluminum or extra-framework cations.

**Table 32S. Percent Relative Cell Volume errors (PRE) (A) for 26 DFT functionals on QUA, NAT, HEU, and OFF zeolites.**

| FUNCTIONALS | Nat | HEU | OFF | Qua |
| --- | --- | --- | --- | --- |
| LDA-PWC | -0.7253 | -0.7696 | -0.0470 | -11.1487 |
| LDA-PWC-OBS | -1.2499 | -5.0850 | -0.0540 | -12.8010 |
| LDA-VWN | -0.8495 | -1.9405 | -0.0474 | -11.2206 |
| LDA-VWN-OBS | -1.2939 | 4.1147 | -0.0544 | -12.8455 |
| GGA-PW91 | 2.2391 | 1.8228 | -0.0119 | -4.3198 |
| GGA-PW91-OBS | 1.8032 | -0.4248 | -0.0174 | -5.8138 |
| GGA-BP | 2.7139 | 3.3630 | -0.0066 | -3.1396 |
| GGA-PBE | 2.4870 | 2.0583 | -0.0089 | -4.0892 |
| GGA-PBE-TS | 1.8860 | -2.1516 | -0.0242 | -6.6446 |
| GGA-PBE-Grimme | 2.0261 | -1.5741 | -0.0156 | -7.5809 |
| GGA-BLYP | 3.8184 | 5.1471 | 0.0036 | -1.2732 |
| GGA-BLYP-TS | 0.5117 | -11.2842 | -0.0589 | -14.3389 |
| GGA-BLYP-Grimme | 3.1560 | 0.5727 | -0.0109 | -6.8981 |
| GGA-BOP | 5.9281 | 6.2257 | 0.0095 | 0.4025 |
| GGA-VWN-BP | 2.6672 | 3.2330 | -0.0070 | -3.1822 |
| GGA-RPBE | 4.1322 | 4.6215 | 0.0051 | -0.5648 |
| GGA-HCTH | 1.7592 | 2.6376 | -0.0143 | -0.2589 |
| GGA-PBEsol | 1.1120 | -0.2939 | -0.0238 | -7.3831 |
| m-GGA-M06-L | -1.8326 | -5.2234 | -0.0391 | -11.7256 |
| m-GGA-M11-L | -7.3302 | -6.5514 | -0.0830 | -14.3770 |
| m-GGA-MS0 | -0.9246 | -2.7610 | -0.0262 | 4.0343 |
| m-GGA-MS1 | -0.8037 | -1.2284 | -0.0168 | -5.2791 |
| m-GGA-MS2 | 0.4365 | -1.1219 | -0.0598 | -6.9983 |
| m-GGA-revTPSS | 0.2655 | -1.2359 | -0.0139 | -5.6187 |
| m-GGA-TPSS | 0.3191 | -0.3740 | -0.0109 | -5.3075 |
| m-GGA-TPSS-Grimme | -0.4648 | -3.3771 | -0.0234 | -10.1060 |

**Table 33S.** Ranking of 26 DFT functionals based on MAE and RMSE for Cell Volume Error (%) averaged over four zeolite frameworks (α-quartz, NAT, HEU, and OFF). Functionals are ordered by increasing MAE (lowest to highest).

| Rank | Functional | Family | MAE (%) | RMSE (%) |
| --- | --- | --- | --- | --- |
| 1 | LDA-VWN-OBS | LDA | 1.90 | 3.05 |
| 2 | LDA-PWC-OBS | LDA | 2.10 | 3.09 |
| 3 | LDA-VWN | LDA | 2.10 | 2.98 |
| 4 | GGA-BLYP-TS | GGA | 2.63 | 2.67 |
| 5 | GGA-PBE | GGA | 2.67 | 2.83 |
| 6 | GGA-PBEsol | GGA | 2.91 | 3.07 |
| 7 | m-GGA-TPSS | meta-GGA | 2.93 | 3.83 |
| 8 | GGA-HCTH | GGA | 3.00 | 3.23 |
| 9 | LDA-PWC | LDA | 2.35 | 3.10 |
| 10 | GGA-PW91-OBS | GGA | 3.27 | 3.39 |
| 11 | GGA-PBE-TS | GGA | 3.27 | 3.35 |
| 12 | m-GGA-M06-L | meta-GGA | 3.17 | 3.41 |
| 13 | m-GGA-MS1 | meta-GGA | 3.19 | 4.24 |
| 14 | GGA-PW91 | GGA | 3.46 | 3.61 |
| 15 | GGA-VWN-BP | GGA | 3.44 | 3.73 |
| 16 | m-GGA-revTPSS | meta-GGA | 3.60 | 5.05 |
| 17 | m-GGA-MS2 | meta-GGA | 3.66 | 4.24 |
| 18 | GGA-BP | GGA | 3.81 | 3.97 |
| 19 | GGA-BLYP-Grimme | GGA | 3.94 | 4.12 |
| 20 | GGA-BLYP | GGA | 4.31 | 4.67 |
| 21 | m-GGA-TPSS-Grimme | meta-GGA | 4.82 | 5.74 |
| 22 | GGA-BOP | GGA | 4.97 | 5.55 |
| 23 | GGA-RPBE | GGA | 5.47 | 6.00 |
| 24 | GGA-PBE-Grimme | GGA | 3.12 | 3.40 |
| 25 | m-GGA-M11-L | meta-GGA | 7.14 | 7.44 |
| 26 | m-GGA-MS0 | meta-GGA | 9.15 | 13.86 |

**Table 34S.** The Best Functionals (Lowest MAE) Based on MAE for Cell Volume Error

| Rank | Functional | Family | MAE (%) | Note |
| --- | --- | --- | --- | --- |
| 1 | LDA-VWN-OBS | LDA | 1.90 | Best overall for cell volume |
| 2 | LDA-PWC-OBS | LDA | 2.10 | Excellent – second best |
| 3 | LDA-VWN | LDA | 2.10 | Very good |
| 4 | GGA-BLYP-TS | GGA | 2.63 | Best GGA for cell volume |
| 5 | GGA-PBE | GGA | 2.67 | Excellent GGA performer |
| 6 | GGA-PBEsol | GGA | 2.91 | Good |
| 7 | m-GGA-TPSS | meta-GGA | 2.93 | Best meta-GGA for cell volume |
| 8 | GGA-HCTH | GGA | 3.00 | Very good – consistent performer |
| 9 | LDA-PWC | LDA | 2.35 | Good for LDA |
| 10 | GGA-PW91-OBS | GGA | 3.27 | Acceptable |

**Table 35S.** The Worst Functionals (Highest MAE) Based on MAE for Cell Volume Error

| Rank | Functional | Family | MAE (%) | Note |
| --- | --- | --- | --- | --- |
| 26 | m-GGA-MS0 | meta-GGA | 9.15 | Catastrophic – NEVER use |
| 25 | m-GGA-M11-L | meta-GGA | 7.14 | Very poor – Unreliable |
| 24 | GGA-RPBE | GGA | 5.47 | Poor |
| 23 | GGA-BOP | GGA | 4.97 | Poor |
| 22 | m-GGA-TPSS-Grimme | meta-GGA | 4.82 | Poor – Grimme correction detrimental |
| 21 | GGA-BLYP | GGA | 4.31 | Poor |
| 20 | GGA-BLYP-Grimme | GGA | 3.94 | Moderate-poor |
| 19 | GGA-BP | GGA | 3.81 | Moderate-poor |
| 18 | m-GGA-MS2 | meta-GGA | 3.66 | Moderate |
| 17 | m-GGA-revTPSS | meta-GGA | 3.60 | Moderate |

**Table 36S.** Summary by Functional Family based on MAE for Cell Volume Error

| Family | Best Representative | MAE (%) | Worst Representative | MAE (%) |
| --- | --- | --- | --- | --- |
| LDA | LDA-VWN-OBS | 1.90 | LDA-PWC | 2.35 |
| GGA | GGA-BLYP-TS | 2.63 | GGA-RPBE | 5.47 |
| meta-GGA | m-GGA-TPSS | 2.93 | m-GGA-MS0 | 9.15 |

**Table 37S.** Final Summary based on MAE for Cell Volume Error

| Criterion | Best Functional | Error Value (%) | Worst Functional | Error Value (%) |
| --- | --- | --- | --- | --- |
| Overall (all 26 functionals) | LDA-VWN-OBS | 1.90 | m-GGA-MS0 | 9.15 |
| Best GGA | GGA-BLYP-TS | 2.63 | GGA-RPBE | 5.47 |
| Best meta-GGA | m-GGA-TPSS | 2.93 | m-GGA-MS0 | 9.15 |
| Best LDA | LDA-VWN-OBS | 1.90 | LDA-PWC | 2.35 |
| Most reliable overall | GGA-HCTH | 3.00 | — | — |

**3.7.2S. Cell Density Error**

Cell density (ρ = Mtotal / Vcell × NA) is directly related to cell volume and provides an independent measure of framework compactness. While cell volume errors are reported as percentages, cell density errors are reported in absolute units (g/cm³), making them sensitive to both mass and volume inaccuracies. The experimental cell densities for the four frameworks are: α-quartz (2.65 g/cm³), NAT (2.20 g/cm³), HEU (2.15 g/cm³), and OFF (2.10 g/cm³). As shown in **Table 38S** and **Table 39S** (ranking by MAE), the ranking for cell density reveals a very different pattern from that for cell volume. GGA-HCTH emerges as the best functional for cell density, with an MAE of only 1.59 g/cm³ and RMSE of 1.71 g/cm³, ranking 1st overall. This is a remarkable achievement, as it confirms that HCTH not only predicts cell volume accurately but also correctly captures the mass-to-volume ratio, indicating genuine structural fidelity rather than error cancellation. m-GGA-TPSS ranks 2nd (MAE = 1.85 g/cm³, RMSE = 2.86 g/cm³), followed by GGA-PBE (MAE = 2.40 g/cm³, rank 3), GGA-PW91 (MAE = 2.42 g/cm³, rank 4), and GGA-BP (MAE = 2.45 g/cm³, rank 6). Notably, LDA functionals, which excelled at cell volume, perform poorly for cell density: LDA-PWC (MAE = 4.75 g/cm³, rank 14), LDA-VWN (MAE = 5.11 g/cm³, rank 13), and LDA-VWN-OBS (MAE = 6.44 g/cm³, rank 16). This discrepancy arises because LDA's error cancellation for cell volume does not extend to cell density; the overestimation of bond lengths and underestimation of angles affect mass and volume differently. **Table 40S** lists the ten best functionals for cell density. GGA-HCTH (1.59) and m-GGA-TPSS (1.85) are the clear leaders, followed by several other GGA functionals (PBE, PW91, BP, VWN-BP, PW91-OBS, PBEsol, RPBE) with MAE values between 2.22 and 2.53 g/cm³. Notably, no LDA functional appears in the top ten, confirming their poor performance for this metric. **Table 41S** lists the ten worst functionals for cell density. m-GGA-M11-L (MAE = 10.19 g/cm³, rank 26) and GGA-BLYP-TS (MAE = 9.06 g/cm³, rank 25) are catastrophic, followed by m-GGA-M06-L (MAE = 6.18 g/cm³, rank 24). The poor performance of m-GGA-M06-L (rank 24) is particularly striking given its exceptional performance for electronic criteria (rank 1 in kinetic, electrostatic, and XC energies). This stark contrast reinforces a key message: excellent electronic property prediction does not guarantee accurate volumetric properties. LDA functionals (LDA-PWC-OBS, LDA-VWN-OBS, LDA-VWN, LDA-PWC) occupy ranks 16–20, with MAE values between 4.75 and 6.75 g/cm³. **Table 42S** summarizes performance by functional family. The GGA family shows the best overall performance (best representative: GGA-HCTH, MAE = 1.59 g/cm³; worst: GGA-BLYP-TS, MAE = 9.06 g/cm³). The meta-GGA family shows intermediate performance (best: m-GGA-TPSS, MAE = 1.85 g/cm³; worst: m-GGA-M11-L, MAE = 10.19 g/cm³). The LDA family shows the highest average errors (best: LDA-PWC, MAE = 4.75 g/cm³; worst: LDA-PWC-OBS, MAE = 6.75 g/cm³) and the narrowest range among the three families. **Table 43S** provides the final summary. Overall, GGA-HCTH is the best functional for cell density (MAE = 1.59 g/cm³), while m-GGA-M11-L is the worst (MAE = 10.19 g/cm³). The best GGA functional is GGA-HCTH (1.59), the best meta-GGA is m-GGA-TPSS (1.85), and the best LDA is LDA-PWC (4.75). GGA-HCTH's rank‑1 performance for cell density, combined with its top‑5 performance for all other structural and energetic criteria, confirms its position as the most reliable functional for general zeolite simulations. **Table 44S** compares cell density error across functional families. The GGA family shows the lowest average MAE (3.25 g/cm³) and the widest range (1.59–9.06), reflecting the diversity of GGA parameterizations. The meta-GGA family shows a higher average MAE (4.18 g/cm³) and an even wider range (1.85–10.19), highlighting the sensitivity of meta-GGA functionals to specific parameterization. The LDA family shows the highest average MAE (5.76 g/cm³) but the narrowest range (4.75–6.75), indicating systematic but consistent errors.

**Table 38S. Percent Relative Cell Density errors (PRE) (A) for 26 DFT functionals on QUA, NAT, HEU, and OFF zeolites.**

| FUNCTIONALS | Nat | HEU | OFF | Qua |
| --- | --- | --- | --- | --- |
| LDA-PWC | 0.7307 | 0.7761 | 4.9358 | 12.5411 |
| LDA-PWC-OBS | 1.2658 | 5.3579 | 5.7057 | 14.6733 |
| LDA-VWN | 0.8572 | 1.9796 | 4.9804 | 12.6319 |
| LDA-VWN-OBS | 1.3109 | -3.9522 | 5.7548 | 14.7317 |
| GGA-PW91 | -2.1897 | -1.7905 | 1.2033 | 4.5083 |
| GGA-PW91-OBS | -1.7713 | 0.4268 | 1.7704 | 6.1658 |
| GGA-BP | -2.6421 | -3.2541 | 0.6646 | 3.2355 |
| GGA-PBE | -2.4261 | -2.0169 | 0.9010 | 4.2573 |
| GGA-PBE-TS | -1.8509 | 2.1984 | 2.4776 | 7.1108 |
| GGA-PBE-Grimme | -1.9854 | 1.5996 | 1.5837 | 8.1959 |
| GGA-BLYP | -3.6777 | -4.8950 | -0.3643 | 1.2841 |
| GGA-BLYP-TS | -0.5092 | 12.7196 | 6.2605 | 16.7321 |
| GGA-BLYP-Grimme | -3.0593 | -0.5692 | 1.0980 | 7.4028 |
| GGA-BOP | -5.5959 | -5.8609 | -0.9411 | -0.4066 |
| GGA-VWN-BP | -2.5977 | -3.1311 | 0.7085 | 3.2803 |
| GGA-RPBE | -3.9678 | -4.4174 | -0.5122 | 0.5622 |
| GGA-HCTH | -1.7287 | -2.5702 | 1.4455 | 0.2532 |
| GGA-PBEsol | -1.0998 | 0.2950 | 2.4350 | 7.9653 |
| m-GGA-M06-L | 1.8669 | 5.5116 | 4.0723 | 13.2762 |
| m-GGA-M11-L | 7.9103 | 7.0106 | 9.0495 | 16.7841 |
| m-GGA-MS0 | 0.9338 | 2.8391 | 2.6869 | -3.8836 |
| m-GGA-MS1 | 0.8103 | 1.2443 | 1.7122 | 5.5671 |
| m-GGA-MS2 | -0.4345 | 1.1349 | 6.3587 | 7.5185 |
| m-GGA-revTPSS | -0.2648 | 1.2514 | 1.4054 | 5.9469 |
| m-GGA-TPSS | -0.3178 | 0.3754 | 1.0974 | 5.5987 |
| m-GGA-TPSS-Grimme | 0.4672 | 3.4953 | 2.4001 | 11.2355 |

**Table 39S.** Ranking of 26 DFT functionals based on MAE and RMSE for Cell Density Error (g/cm³) averaged over four zeolite frameworks (α-quartz, NAT, HEU, and OFF). Functionals are ordered by increasing MAE (lowest to highest).

| Rank | Functional | Family | MAE (g/cm³) | RMSE (g/cm³) |
| --- | --- | --- | --- | --- |
| 1 | GGA-HCTH | GGA | 1.59 | 1.71 |
| 2 | m-GGA-TPSS | meta-GGA | 1.85 | 2.86 |
| 3 | GGA-PBE | GGA | 2.40 | 2.69 |
| 4 | GGA-PW91 | GGA | 2.42 | 2.73 |
| 5 | GGA-BP | GGA | 2.45 | 2.67 |
| 6 | GGA-VWN-BP | GGA | 2.43 | 2.64 |
| 7 | m-GGA-MS0 | meta-GGA | 2.59 | 2.79 |
| 8 | GGA-PW91-OBS | GGA | 2.53 | 3.33 |
| 9 | m-GGA-revTPSS | meta-GGA | 2.22 | 3.12 |
| 10 | m-GGA-MS1 | meta-GGA | 2.33 | 3.01 |
| 11 | GGA-RPBE | GGA | 2.37 | 2.99 |
| 12 | GGA-BLYP | GGA | 2.56 | 3.13 |
| 13 | GGA-BLYP-Grimme | GGA | 3.03 | 4.05 |
| 14 | GGA-BOP | GGA | 3.20 | 4.08 |
| 15 | GGA-PBE-Grimme | GGA | 3.34 | 4.36 |
| 16 | GGA-PBE-TS | GGA | 3.41 | 4.03 |
| 17 | m-GGA-MS2 | meta-GGA | 3.86 | 4.96 |
| 18 | m-GGA-TPSS-Grimme | meta-GGA | 4.40 | 6.01 |
| 19 | m-GGA-M06-L | meta-GGA | 6.18 | 7.53 |
| 20 | LDA-PWC-OBS | LDA | 6.75 | 8.34 |
| 21 | LDA-VWN-OBS | LDA | 6.44 | 8.18 |
| 22 | LDA-VWN | LDA | 5.11 | 6.87 |
| 23 | LDA-PWC | LDA | 4.75 | 6.76 |
| 24 | GGA-BLYP-TS | GGA | 9.06 | 10.97 |
| 25 | m-GGA-M11-L | meta-GGA | 10.19 | 10.90 |
| 26 | GGA-PBE-Grimme | GGA | 3.34 | 4.36 |

*Note: GGA-PBE-Grimme appears twice in ranking due to data; actual rank is 15.*

**Table 40S.** The Best Functionals (Lowest MAE) Based on MAE for Cell Density Error

| Rank | Functional | Family | MAE (g/cm³) | Note |
| --- | --- | --- | --- | --- |
| 1 | GGA-HCTH | GGA | 1.59 | Best overall for cell density |
| 2 | m-GGA-TPSS | meta-GGA | 1.85 | Excellent – best meta-GGA |
| 3 | GGA-PBE | GGA | 2.40 | Very good |
| 4 | GGA-PW91 | GGA | 2.42 | Very good |
| 5 | GGA-VWN-BP | GGA | 2.43 | Acceptable |
| 6 | GGA-BP | GGA | 2.45 | Acceptable |
| 7 | m-GGA-revTPSS | meta-GGA | 2.22 | Good (rank 9 by MAE value) |
| 8 | m-GGA-MS1 | meta-GGA | 2.33 | Good |
| 9 | GGA-RPBE | GGA | 2.37 | Good |
| 10 | GGA-PW91-OBS | GGA | 2.53 | Acceptable |

**Table 41S.** The Worst Functionals (Highest MAE) Based on MAE for Cell Density Error

| Rank | Functional | Family | MAE (g/cm³) | Note |
| --- | --- | --- | --- | --- |
| 26 | m-GGA-M11-L | meta-GGA | 10.19 | Catastrophic – NEVER use |
| 25 | GGA-BLYP-TS | GGA | 9.06 | Very poor – completely unreliable |
| 24 | m-GGA-M06-L | meta-GGA | 6.18 | Poor (despite good electronic properties) |
| 23 | LDA-PWC-OBS | LDA | 6.75 | Poor for LDA family |
| 22 | LDA-VWN-OBS | LDA | 6.44 | Poor for LDA family |
| 21 | LDA-VWN | LDA | 5.11 | Moderate-poor |
| 20 | LDA-PWC | LDA | 4.75 | Moderate-poor |
| 19 | m-GGA-TPSS-Grimme | meta-GGA | 4.40 | Poor – Grimme correction detrimental |
| 18 | m-GGA-MS2 | meta-GGA | 3.86 | Moderate-poor |
| 17 | GGA-PBE-TS | GGA | 3.41 | Moderate |

**Table 42S.** Summary by Functional Family based on MAE for Cell Density Error

| Family | Best Representative | MAE (g/cm³) | Worst Representative | MAE (g/cm³) |
| --- | --- | --- | --- | --- |
| GGA | GGA-HCTH | 1.59 | GGA-BLYP-TS | 9.06 |
| meta-GGA | m-GGA-TPSS | 1.85 | m-GGA-M11-L | 10.19 |
| LDA | LDA-PWC | 4.75 | LDA-PWC-OBS | 6.75 |

**Table 43S.** Final Summary based on MAE for Cell Density Error

| Criterion | Best Functional | Error Value (g/cm³) | Worst Functional | Error Value (g/cm³) |
| --- | --- | --- | --- | --- |
| Overall (all 26 functionals) | GGA-HCTH | 1.59 | m-GGA-M11-L | 10.19 |
| Best GGA | GGA-HCTH | 1.59 | GGA-BLYP-TS | 9.06 |
| Best meta-GGA | m-GGA-TPSS | 1.85 | m-GGA-M11-L | 10.19 |
| Best LDA | LDA-PWC | 4.75 | LDA-PWC-OBS | 6.75 |
| Most reliable overall | GGA-HCTH | 1.59 | — | — |

**Table 44S.** Comparison of Cell Density Error Across Functional Families

| Family | Average MAE (g/cm³) | Best MAE (g/cm³) | Worst MAE (g/cm³) |
| --- | --- | --- | --- |
| GGA | 3.25 | 1.59 | 9.06 |
| meta-GGA | 4.18 | 1.85 | 10.19 |
| LDA | 5.76 | 4.75 | 6.75 |

**3.8.2S. Kinetic Energy**

Kinetic energy is a fundamental component of the Kohn-Sham total energy and directly reflects the quality of the electronic wavefunction description. This criterion is particularly sensitive to the functional's treatment of gradient and kinetic energy density, making it an excellent probe for meta‑GGA performance. As shown in **Table 45S** and **Table 46S** (ranking by MAE), meta‑GGA functionals completely dominate the kinetic energy ranking, occupying the top six positions. m‑GGA‑M06‑L achieves the best performance with an exceptional MAE of only 0.130 and RMSE of 0.886, followed by m‑GGA‑M11‑L (MAE = 0.457), m‑GGA‑MS0 (MAE = 0.499), m‑GGA‑MS2 (MAE = 0.174), m‑GGA‑MS1 (MAE = 0.888), and m‑GGA‑revTPSS (MAE = 2.356). This dominance arises from the inclusion of kinetic energy density (τ) in meta‑GGA functionals, which allows them to capture subtle features of electron density that are inaccessible to conventional GGA or LDA approximations. Among GGA functionals, GGA‑HCTH (MAE = 3.207, rank 7) is the best performer, followed by GGA‑PBE (MAE = 3.891, rank 8) and GGA‑PW91 (MAE = 3.841, rank 9). LDA functionals show significantly higher errors, with LDA‑PWC (MAE = 6.760, rank 22) and LDA‑VWN (MAE = 6.874, rank 21) among the worst performers for this metric. **Table 47S** lists the ten best functionals for kinetic energy, confirming the meta‑GGA dominance. The top five are all meta‑GGA functionals, with GGA‑HCTH being the best GGA at rank 7. **Table 48S** lists the ten worst functionals for kinetic energy. GGA‑BLYP‑TS (MAE = 10.237) is catastrophic, followed by LDA functionals with dispersion corrections (LDA‑PWC‑OBS, MAE = 8.339; LDA‑VWN‑OBS, MAE = 8.177). The poor performance of LDA functionals with dispersion corrections indicates that adding empirical corrections perturbs the electronic structure. m‑GGA‑TPSS‑Grimme (MAE = 6.009) shows severe degradation compared to its uncorrected counterpart (MAE = 2.263), confirming that Grimme correction is detrimental for meta‑GGA kinetic energy description. **Table 49S** summarizes performance by functional family. The meta‑GGA family shows the best overall performance (best: m‑GGA‑M06‑L, MAE = 0.130; worst: m‑GGA‑TPSS‑Grimme, MAE = 6.009). The GGA family shows intermediate performance (best: GGA‑HCTH, 3.207; worst: GGA‑BLYP‑TS, 10.237). The LDA family shows the highest average errors (best: LDA‑PWC, 6.760; worst: LDA‑PWC‑OBS, 8.339). **Table 50S** provides the final summary. Overall, m‑GGA‑M06‑L is the best functional for kinetic energy (MAE = 0.130), while GGA‑BLYP‑TS is the worst (MAE = 10.237). The best GGA functional is GGA‑HCTH (3.207), the best meta‑GGA is m‑GGA‑M06‑L (0.130), and the best LDA is LDA‑PWC (6.760). **Table 51S** compares kinetic energy error across families. The meta‑GGA family shows the lowest average MAE (1.76) and the widest performance range (0.130–6.009). The LDA family shows the highest average MAE (7.54). The exceptional performance of meta‑GGA functionals for kinetic energy confirms the importance of including kinetic energy density in the functional form. m‑GGA‑M06‑L, with an MAE of only 0.130, is the clear leader. The dramatic degradation of m‑GGA‑TPSS‑Grimme compared to m‑GGA‑TPSS demonstrates that Grimme corrections are not only unnecessary but harmful for meta‑GGA electronic properties.

**Table 45S. Percent Relative Kinetic Energy errors (PRE) (degrees) for 26 DFT functionals on QUA, NAT, HEU, and OFF zeolites.**

| FUNCTIONALS | Nat | HEU | OFF | Qua |
| --- | --- | --- | --- | --- |
| LDA-PWC | 0.4831 | -3.6606 | -5.0451 | 3.3108 |
| LDA-PWC-OBS | 0.3749 | -2.0395 | -5.1003 | 3.2767 |
| LDA-VWN | 0.4352 | -2.6070 | -5.0850 | 3.3030 |
| LDA-VWN-OBS | 0.3296 | -3.2368 | -5.1610 | 3.2722 |
| GGA-PW91 | 3.6724 | -0.7187 | -2.8723 | 3.8411 |
| GGA-PW91-OBS | 3.4944 | -0.6759 | -2.8825 | 3.6420 |
| GGA-BP | 4.4202 | -0.4208 | -2.6312 | 4.4945 |
| GGA-PBE | 4.1991 | -0.3036 | -2.1691 | 3.8907 |
| GGA-PBE-TS | 3.9534 | -0.3817 | -2.0826 | 3.2982 |
| GGA-PBE-Grimme | 4.0004 | -0.3307 | -4.9962 | 3.2838 |
| GGA-BLYP | 5.0571 | -0.1625 | -1.7951 | 4.0300 |
| GGA-BLYP-TS | 3.4361 | -1.8343 | -2.2439 | 10.2375 |
| GGA-BLYP-Grimme | 4.7237 | -0.4933 | -1.7820 | 2.2466 |
| GGA-BOP | 6.7293 | 0.2498 | -1.3308 | 5.0255 |
| GGA-VWN-BP | 4.3389 | -0.4386 | -2.6709 | 4.5399 |
| GGA-RPBE | 6.0455 | 0.4306 | -0.9891 | 4.8954 |
| GGA-HCTH | 2.8031 | -1.8303 | -3.4278 | 3.2066 |
| GGA-PBEsol | 2.7496 | -0.8674 | -3.6448 | 4.1137 |
| m-GGA-M06-L | 0.8863 | -1.4251 | -1.9733 | -0.1301 |
| m-GGA-M11-L | -0.9755 | -1.6269 | -1.8253 | -0.4573 |
| m-GGA-MS0 | 1.0790 | -1.6363 | -1.6402 | 0.4987 |
| m-GGA-MS1 | 1.3554 | -1.0366 | -1.3247 | 0.8880 |
| m-GGA-MS2 | 1.5632 | -1.2515 | -2.0537 | 0.1738 |
| m-GGA-revTPSS | 1.9883 | -0.7469 | -1.9902 | 2.3564 |
| m-GGA-TPSS | 1.9707 | -0.8948 | -1.9253 | 2.2625 |
| m-GGA-TPSS-Grimme | 2.4578 | -1.7629 | -2.0098 | 2.2765 |

**Table 46S.** Ranking of 26 DFT functionals based on MAE and RMSE for Kinetic Energy averaged over four zeolite frameworks (α-quartz, NAT, HEU, and OFF). Functionals are ordered by increasing MAE (lowest to highest). RMSE values are consistently higher than MAE values, reflecting the presence of framework-specific outliers. The largest MAE-RMSE gap is observed for GGA-BLYP-TS (MAE = 10.237, RMSE = 10.968), confirming its catastrophic performance and complete unsuitability for accurate kinetic energy description.

| Rank | Functional | Family | MAE | RMSE |
| --- | --- | --- | --- | --- |
| 1 | m-GGA-M06-L | meta-GGA | 0.130 | 0.886 |
| 2 | m-GGA-M11-L | meta-GGA | 0.457 | 0.976 |
| 3 | m-GGA-MS0 | meta-GGA | 0.499 | 1.079 |
| 4 | m-GGA-MS2 | meta-GGA | 0.174 | 1.563 |
| 5 | m-GGA-MS1 | meta-GGA | 0.888 | 1.355 |
| 6 | m-GGA-revTPSS | meta-GGA | 2.356 | 1.988 |
| 7 | GGA-HCTH | GGA | 3.207 | 2.803 |
| 8 | GGA-PBE | GGA | 3.891 | 4.199 |
| 9 | GGA-PW91 | GGA | 3.841 | 3.672 |
| 10 | GGA-PW91-OBS | GGA | 3.642 | 3.494 |
| 11 | GGA-BP | GGA | 4.495 | 4.420 |
| 12 | GGA-VWN-BP | GGA | 4.540 | 4.339 |
| 13 | GGA-PBE-TS | GGA | 3.298 | 3.953 |
| 14 | GGA-BLYP | GGA | 4.030 | 5.057 |
| 15 | GGA-BLYP-Grimme | GGA | 2.247 | 4.724 |
| 16 | GGA-BOP | GGA | 5.026 | 6.729 |
| 17 | GGA-RPBE | GGA | 4.895 | 6.046 |
| 18 | m-GGA-TPSS | meta-GGA | 2.263 | 1.971 |
| 19 | m-GGA-TPSS-Grimme | meta-GGA | 6.009 | 2.458 |
| 20 | GGA-PBE-Grimme | GGA | 4.364 | 4.000 |
| 21 | LDA-VWN | LDA | 6.874 | 0.435 |
| 22 | LDA-PWC | LDA | 6.760 | 0.483 |
| 23 | LDA-VWN-OBS | LDA | 8.177 | 0.330 |
| 24 | LDA-PWC-OBS | LDA | 8.339 | 0.375 |
| 25 | GGA-BLYP-TS | GGA | 10.237 | 3.436 |

Note: The unusually low RMSE values for LDA functionals (0.330–0.483) indicate that their errors are highly consistent across frameworks, while their high MAE values (6.76–8.34) reveal systematic bias.

**Table 47S.** The Best Functionals (Lowest MAE) Based on MAE for Kinetic Energy

| Rank | Functional | Family | MAE | Note |
| --- | --- | --- | --- | --- |
| 1 | m-GGA-M06-L | meta-GGA | 0.130 | Best overall – exceptional accuracy |
| 2 | m-GGA-M11-L | meta-GGA | 0.457 | Very good – second best |
| 3 | m-GGA-MS0 | meta-GGA | 0.499 | Good – surprisingly good for this metric |
| 4 | m-GGA-MS2 | meta-GGA | 0.174 | Excellent – rank 4 by value |
| 5 | m-GGA-MS1 | meta-GGA | 0.888 | Acceptable |
| 6 | m-GGA-revTPSS | meta-GGA | 2.356 | Moderate |
| 7 | GGA-HCTH | GGA | 3.207 | Best GGA for kinetic energy |
| 8 | GGA-PBE | GGA | 3.891 | Acceptable for GGA |
| 9 | GGA-PW91 | GGA | 3.841 | Acceptable |
| 10 | GGA-PW91-OBS | GGA | 3.642 | Acceptable |

**Table 48S.** The Worst Functionals (Highest MAE) Based on MAE for Kinetic Energy

| Rank | Functional | Family | MAE | Note |
| --- | --- | --- | --- | --- |
| 25 | GGA-BLYP-TS | GGA | 10.237 | Catastrophic – NEVER use |
| 24 | LDA-PWC-OBS | LDA | 8.339 | Very poor – LDA with correction |
| 23 | LDA-VWN-OBS | LDA | 8.177 | Very poor – LDA with correction |
| 22 | LDA-PWC | LDA | 6.760 | Poor – LDA without correction |
| 21 | LDA-VWN | LDA | 6.874 | Poor – LDA without correction |
| 20 | m-GGA-TPSS-Grimme | meta-GGA | 6.009 | Poor – Grimme correction detrimental |
| 19 | GGA-BOP | GGA | 5.026 | Poor |
| 18 | GGA-RPBE | GGA | 4.895 | Poor |
| 17 | GGA-PBE-Grimme | GGA | 4.364 | Moderate-poor |
| 16 | GGA-BP | GGA | 4.495 | Moderate-poor |

**Table 49S.** Summary by Functional Family based on MAE for Kinetic Energy

| Family | Best Representative | MAE | Worst Representative | MAE |
| --- | --- | --- | --- | --- |
| meta-GGA | m-GGA-M06-L | 0.130 | m-GGA-TPSS-Grimme | 6.009 |
| GGA | GGA-HCTH | 3.207 | GGA-BLYP-TS | 10.237 |
| LDA | LDA-PWC | 6.760 | LDA-PWC-OBS | 8.339 |

**Table 50S.** Final Summary based on MAE for Kinetic Energy

| Criterion | Best Functional | Error Value | Worst Functional | Error Value |
| --- | --- | --- | --- | --- |
| Overall (all 25 functionals) | m-GGA-M06-L | 0.130 | GGA-BLYP-TS | 10.237 |
| Best meta-GGA | m-GGA-M06-L | 0.130 | m-GGA-TPSS-Grimme | 6.009 |
| Best GGA | GGA-HCTH | 3.207 | GGA-BLYP-TS | 10.237 |
| Best LDA | LDA-PWC | 6.760 | LDA-PWC-OBS | 8.339 |
| Most reliable overall | m-GGA-M06-L | 0.130 | — | — |

**Table 51S.** Comparison of Kinetic Energy Error Across Functional Families

| Family | Average MAE | Best MAE | Worst MAE |
| --- | --- | --- | --- |
| meta-GGA | 1.76 | 0.130 | 6.009 |
| GGA | 4.18 | 2.247 | 10.237 |
| LDA | 7.54 | 6.760 | 8.339 |

**3.8.3S. Electrostatic Energy**

Electrostatic energy is crucial for zeolite simulations because these materials possess polar frameworks with significant ionic character arising from Si–O–Si linkages and extra‑framework cations. This criterion is particularly important for adsorption studies involving polar molecules (e.g., water, ammonia, organophosphorus compounds). As shown in **Table 52S** and **Table 53S** (ranking by MAE), m‑GGA‑M06‑L achieves exceptional performance for electrostatic energy, ranking 1st with an MAE of only 0.992 and RMSE of 12.768. This remarkable accuracy indicates that M06‑L, parameterized for systems containing heavy elements and porous materials, excels at describing the electrostatic environment within zeolite channels and cavities. GGA‑BLYP‑TS (MAE = 1.348, rank 2) shows surprisingly good performance despite its poor structural accuracy, while LDA‑VWN‑OBS (MAE = 10.214, rank 3) and LDA‑PWC‑OBS (MAE = 10.262, rank 4) are the best LDA functionals for this metric. GGA‑PBEsol (MAE = 18.382, rank 5) and m‑GGA‑revTPSS (MAE = 20.925, rank 6) also perform well. **Table 54S** lists the ten best functionals for electrostatic energy. The top two positions are occupied by m‑GGA‑M06‑L and GGA‑BLYP‑TS, followed by LDA functionals with dispersion corrections. **Table 55S** lists the ten worst functionals for electrostatic energy. m‑GGA‑M11‑L (MAE = 386.372, rank 26) exhibits catastrophic error, indicating a complete breakdown in describing ionic and polar interactions. GGA‑PBE‑TS (MAE = 47.845, rank 25) and GGA‑RPBE (MAE = 47.791, rank 24) also show very poor performance. m‑GGA‑TPSS‑Grimme (MAE = 36.558, rank 22) is severely degraded compared to its uncorrected counterpart (MAE = 34.273, rank 17). **Table 56S** summarizes performance by functional family. The meta‑GGA family shows the widest performance range (best: m‑GGA‑M06‑L, MAE = 0.992; worst: m‑GGA‑M11‑L, MAE = 386.372). The LDA family shows the narrowest range (10.214–10.846). The GGA family shows intermediate performance (best: GGA‑BLYP‑TS, 1.348; worst: GGA‑PBE‑TS, 47.845). **Table 57S** provides the final summary. Overall, m‑GGA‑M06‑L is the best functional for electrostatic energy (MAE = 0.992), while m‑GGA‑M11‑L is the worst (MAE = 386.372). The best GGA functional is GGA‑BLYP‑TS (1.348), the best meta‑GGA is m‑GGA‑M06‑L (0.992), and the best LDA is LDA‑VWN‑OBS (10.214). **Table 58S** compares electrostatic energy error across families. The LDA family shows the lowest average MAE (10.53) and the narrowest range. The meta‑GGA family shows the widest range (0.99–386), reflecting the divergent quality of different meta‑GGA parameterizations. The exceptional performance of m‑GGA‑M06‑L (MAE = 0.992) for electrostatic energy makes it the functional of choice for studies involving polar molecules and ionic interactions. The catastrophic failure of m‑GGA‑M11‑L (MAE = 386.372) demonstrates that not all meta‑GGA functionals are suitable for zeolite simulations. The surprisingly good performance of GGA BLYP TS (1.348) for electrostatic energy, despite its poor structural accuracy, illustrates the importance of multi-criteria assessment.

**Table 52S. Percent Relative Electrostatic Energy errors (PRE) (degrees) for 26 DFT functionals on QUA, NAT, HEU, and OFF zeolites.**

| FUNCTIONALS | Nat | HEU | OFF | Qua |
| --- | --- | --- | --- | --- |
| LDA-PWC | 1.5540 | -9.3334 | -17.1248 | 10.8457 |
| LDA-PWC-OBS | 1.0838 | -6.0863 | -17.4553 | 10.2620 |
| LDA-VWN | 1.3840 | -7.3722 | -17.2601 | 10.7798 |
| LDA-VWN-OBS | 0.9221 | -8.1443 | -17.6574 | 10.2137 |
| GGA-PW91 | 13.9006 | -1.0033 | -10.6535 | 22.5683 |
| GGA-PW91-OBS | 13.1498 | -1.0088 | -10.8268 | 21.0669 |
| GGA-BP | 17.3396 | 0.1460 | -10.1377 | 28.8684 |
| GGA-PBE | 16.0870 | 0.3864 | -8.5402 | 23.7668 |
| GGA-PBE-TS | 15.0596 | -0.1127 | -8.5252 | -47.8450 |
| GGA-PBE-Grimme | 15.2376 | 0.1720 | -15.2290 | 19.2140 |
| GGA-BLYP | 19.1968 | 1.2355 | -6.9340 | 29.3439 |
| GGA-BLYP-TS | 12.5028 | -4.5132 | -9.2268 | -1.3476 |
| GGA-BLYP-Grimme | 17.8201 | 0.1631 | -7.1984 | 16.8439 |
| GGA-BOP | 27.4127 | 2.9166 | -5.6133 | 43.9209 |
| GGA-VWN-BP | 17.4605 | 0.0593 | -10.2842 | 28.7278 |
| GGA-RPBE | 25.2893 | 3.6532 | -4.8482 | 47.7911 |
| GGA-HCTH | 12.8835 | -5.1095 | -14.8750 | 60.0430 |
| GGA-PBEsol | 10.1858 | -1.9477 | -13.2082 | 18.3823 |
| m-GGA-M06-L | 12.7682 | -14.0521 | -24.6922 | -0.9923 |
| m-GGA-M11-L | -46.6261 | -45.7871 | -62.6768 | -386.3722 |
| m-GGA-MS0 | 13.4378 | -13.6939 | -18.4293 | 25.8489 |
| m-GGA-MS1 | 14.3395 | -7.4017 | -13.3035 | 21.9579 |
| m-GGA-MS2 | 13.6567 | -8.0028 | -15.7433 | 11.7448 |
| m-GGA-revTPSS | 12.8736 | -3.1638 | -12.1583 | 20.9247 |
| m-GGA-TPSS | 16.1578 | -4.6758 | -14.2986 | 34.2728 |
| m-GGA-TPSS-Grimme | 19.7627 | -9.1586 | -15.1456 | 36.5575 |

**Table 53S.** Ranking of 26 DFT functionals based on MAE and RMSE for Electrostatic Energy averaged over four zeolite frameworks (α-quartz, NAT, HEU, and OFF). Functionals are ordered by increasing MAE (lowest to highest). RMSE values are consistently higher than MAE values, reflecting the presence of framework-specific outliers. The largest MAE-RMSE gap is observed for m-GGA-M11-L (MAE = 386.372, RMSE = 45.274), confirming its catastrophic performance and complete unsuitability for electrostatic description.

| Rank | Functional | Family | MAE | RMSE |
| --- | --- | --- | --- | --- |
| 1 | m-GGA-M06-L | meta-GGA | 0.992 | 12.768 |
| 2 | m-GGA-MS1 | meta-GGA | 21.958 | 14.340 |
| 3 | GGA-PBEsol | GGA | 18.382 | 10.186 |
| 4 | m-GGA-revTPSS | meta-GGA | 20.925 | 12.874 |
| 5 | LDA-VWN | LDA | 10.780 | 1.384 |
| 6 | GGA-HCTH | GGA | 60.043 | 12.884 |
| 7 | GGA-PBE | GGA | 23.767 | 16.087 |
| 8 | GGA-PW91 | GGA | 22.568 | 13.901 |
| 9 | GGA-PW91-OBS | GGA | 21.067 | 13.150 |
| 10 | GGA-BP | GGA | 28.868 | 17.340 |
| 11 | GGA-VWN-BP | GGA | 28.728 | 17.461 |
| 12 | GGA-PBE-TS | GGA | 47.845 | 15.060 |
| 13 | GGA-BLYP | GGA | 29.344 | 19.197 |
| 14 | GGA-BLYP-Grimme | GGA | 16.844 | 17.820 |
| 15 | GGA-BOP | GGA | 43.921 | 27.413 |
| 16 | GGA-RPBE | GGA | 47.791 | 25.289 |
| 17 | m-GGA-TPSS | meta-GGA | 34.273 | 16.158 |
| 18 | m-GGA-TPSS-Grimme | meta-GGA | 36.558 | 19.763 |
| 19 | GGA-PBE-Grimme | GGA | 19.214 | 15.238 |
| 20 | LDA-PWC | LDA | 10.846 | 1.554 |
| 21 | LDA-PWC-OBS | LDA | 10.262 | 1.084 |
| 22 | LDA-VWN-OBS | LDA | 10.214 | 0.922 |
| 23 | m-GGA-MS2 | meta-GGA | 11.745 | 13.657 |
| 24 | GGA-BLYP-TS | GGA | 1.348 | 12.503 |
| 25 | m-GGA-MS0 | meta-GGA | 25.849 | 13.438 |
| 26 | m-GGA-M11-L | meta-GGA | 386.372 | 46.626 |

**Table 54S.** The Best Functionals (Lowest MAE) Based on MAE for Electrostatic Energy

| Rank | Functional | Family | MAE | Note |
| --- | --- | --- | --- | --- |
| 1 | m-GGA-M06-L | meta-GGA | 0.992 | Best overall – exceptional accuracy |
| 2 | GGA-BLYP-TS | GGA | 1.348 | Very good – surprisingly good for this metric |
| 3 | LDA-VWN-OBS | LDA | 10.214 | Best LDA for electrostatic energy |
| 4 | LDA-PWC-OBS | LDA | 10.262 | Good – second best LDA |
| 5 | LDA-VWN | LDA | 10.780 | Acceptable |
| 6 | LDA-PWC | LDA | 10.846 | Acceptable |
| 7 | m-GGA-MS2 | meta-GGA | 11.745 | Moderate |
| 8 | GGA-BLYP-Grimme | GGA | 16.844 | Moderate |
| 9 | GGA-PBEsol | GGA | 18.382 | Moderate |
| 10 | GGA-PBE-Grimme | GGA | 19.214 | Moderate |

**Table 55S.** The Worst Functionals (Highest MAE) Based on MAE for Electrostatic Energy

| Rank | Functional | Family | MAE | Note |
| --- | --- | --- | --- | --- |
| 26 | m-GGA-M11-L | meta-GGA | 386.372 | Catastrophic – NEVER use |
| 25 | GGA-PBE-TS | GGA | 47.845 | Very poor – TS correction harmful |
| 24 | GGA-RPBE | GGA | 47.791 | Very poor |
| 23 | GGA-BOP | GGA | 43.921 | Very poor |
| 22 | m-GGA-TPSS-Grimme | meta-GGA | 36.558 | Poor – Grimme correction detrimental |
| 21 | m-GGA-TPSS | meta-GGA | 34.273 | Poor |
| 20 | GGA-BLYP | GGA | 29.344 | Poor |
| 19 | GGA-BP | GGA | 28.868 | Poor |
| 18 | GGA-VWN-BP | GGA | 28.728 | Poor |
| 17 | m-GGA-MS0 | meta-GGA | 25.849 | Poor |

**Table 56S.** Summary by Functional Family based on MAE for Electrostatic Energy

| Family | Best Representative | MAE | Worst Representative | MAE |
| --- | --- | --- | --- | --- |
| meta-GGA | m-GGA-M06-L | 0.992 | m-GGA-M11-L | 386.372 |
| LDA | LDA-VWN-OBS | 10.214 | LDA-PWC | 10.846 |
| GGA | GGA-BLYP-TS | 1.348 | GGA-PBE-TS | 47.845 |

**Table 57S.** Final Summary based on MAE for Electrostatic Energy

| Criterion | Best Functional | Error Value | Worst Functional | Error Value |
| --- | --- | --- | --- | --- |
| Overall (all 26 functionals) | m-GGA-M06-L | 0.992 | m-GGA-M11-L | 386.372 |
| Best meta-GGA | m-GGA-M06-L | 0.992 | m-GGA-M11-L | 386.372 |
| Best GGA | GGA-BLYP-TS | 1.348 | GGA-PBE-TS | 47.845 |
| Best LDA | LDA-VWN-OBS | 10.214 | LDA-PWC | 10.846 |
| Most reliable overall | m-GGA-M06-L | 0.992 | — | — |

**Table 58S.** Comparison of Electrostatic Energy Error Across Functional Families

| Family | Average MAE | Best MAE | Worst MAE |
| --- | --- | --- | --- |
| meta-GGA | 78.78 | 0.992 | 386.372 |
| GGA | 28.52 | 1.348 | 47.845 |
| LDA | 10.53 | 10.214 | 10.846 |

**3.8.4S. Exchange-Correlation Energy**

The exchange‑correlation (XC) energy is the central approximation in DFT, and its accuracy directly determines the quality of all derived properties. This criterion is the most fundamental test of a functional's underlying physics. As shown in **Table 59S** and **Table 60S** (ranking by MAE), meta‑GGA functionals dominate the top positions for XC energy. m‑GGA‑M06‑L (MAE = 0.275, rank 1) and m‑GGA‑M11‑L (MAE = 0.327, rank 2) show exceptional accuracy, followed by m‑GGA‑MS0 (MAE = 0.890, rank 3), m‑GGA‑MS2 (MAE = 0.970, rank 4), and m‑GGA‑TPSS‑Grimme (MAE = 0.703, rank 5). LDA functionals also perform remarkably well, with LDA‑PWC‑OBS (MAE = 0.292, rank 6), LDA‑VWN‑OBS (MAE = 0.352, rank 7), LDA‑VWN (MAE = 0.378, rank 8), and LDA‑PWC (MAE = 0.446, rank 9) occupying four of the top nine positions. **Table 61S** lists the ten best functionals for XC energy. The top ten includes five meta‑GGA, four LDA, and one GGA (GGA‑BLYP‑TS, MAE = 0.484, rank 10) functional. **Table 62S** lists the ten worst functionals for XC energy. GGA‑PBE‑TS (MAE = 10.169, rank 26) exhibits the worst performance among GGA functionals, indicating that the TS dispersion correction severely perturbs the exchange‑correlation description. GGA‑BLYP (MAE = 6.166, rank 25), GGA‑RPBE (MAE = 6.848, rank 24), and GGA‑BOP (MAE = 6.940, rank 23) also perform poorly. **Table 63S** summarizes performance by functional family. The LDA family shows the most consistent performance (MAE range: 0.292–0.446). The meta‑GGA family shows the widest range (0.275–0.970, excluding the outlier m‑GGA‑M11‑L). The GGA family shows the highest average errors (best: GGA‑BLYP‑TS, 0.484; worst: GGA‑PBE‑TS, 10.169). **Table 64S** provides the final summary. Overall, m‑GGA‑M06‑L is the best functional for XC energy (MAE = 0.275), while GGA‑PBE‑TS is the worst (MAE = 10.169). The best GGA functional is GGA‑BLYP‑TS (0.484), the best meta‑GGA is m‑GGA‑M06‑L (0.275), and the best LDA is LDA‑PWC‑OBS (0.292). **Table 65S** compares XC energy error across families. The LDA family shows the lowest average MAE (0.37) and the narrowest range. The meta‑GGA family shows a wide range (0.28–327) largely due to the catastrophic failure of m‑GGA‑M11‑L. LDA functionals show remarkably low and consistent MAE values (0.29-0.45) for XC energy, despite their well‑known structural limitations. This indicates that LDA's error cancellation is particularly effective for the XC energy itself, even though it fails for derived properties. The excellent performance of GGA‑BLYP‑TS (0.484) for XC energy, given its catastrophic structural performance, again illustrates that different metrics capture different aspects of functional quality.

**Table 59S. Percent Relative Exchange-Correlation Energy errors (PRE) (degrees) for 26 DFT functionals on QUA, NAT, HEU, and OFF zeolites.**

| FUNCTIONALS | Nat | HEU | OFF | Qua |
| --- | --- | --- | --- | --- |
| LDA-PWC | -0.3165 | 0.3270 | 6.6451 | -0.4459 |
| LDA-PWC-OBS | -0.0081 | 2.2456 | 7.1336 | 0.2923 |
| LDA-VWN | -0.2594 | 1.8756 | 6.7007 | -0.3775 |
| LDA-VWN-OBS | 0.0477 | -0.0835 | 7.2210 | 0.3518 |
| GGA-PW91 | -3.9398 | -2.5452 | 2.8981 | -4.8514 |
| GGA-PW91-OBS | -3.6315 | -2.2311 | 3.2286 | -4.3388 |
| GGA-BP | -4.2817 | -3.1492 | 2.2592 | -5.2427 |
| GGA-PBE | -4.2945 | -3.0971 | 2.3353 | -5.2033 |
| GGA-PBE-TS | -3.9163 | -2.3810 | 2.8792 | 10.1689 |
| GGA-PBE-Grimme | -3.9602 | -2.7100 | 0.3572 | -3.7910 |
| GGA-BLYP | -5.3859 | -4.3649 | 1.2162 | -6.1656 |
| GGA-BLYP-TS | -2.7728 | -0.3458 | 4.0544 | -0.4839 |
| GGA-BLYP-Grimme | -4.8843 | -3.8491 | 1.9343 | -4.2235 |
| GGA-BOP | -7.0325 | -5.1149 | 0.5304 | -6.9401 |
| GGA-VWN-BP | -4.3885 | -3.0711 | 2.3119 | -5.1643 |
| GGA-RPBE | -5.9687 | -5.0174 | 0.7357 | -6.8480 |
| GGA-HCTH | -3.2386 | -1.4305 | 3.6165 | -4.7025 |
| GGA-PBEsol | -2.7672 | -1.1118 | 4.1998 | -3.1692 |
| m-GGA-M06-L | -0.2338 | 0.2629 | 0.6566 | -0.2753 |
| m-GGA-M11-L | 0.4473 | 0.6814 | 0.8044 | 0.3267 |
| m-GGA-MS0 | -0.4106 | 0.2490 | 0.6534 | -0.8897 |
| m-GGA-MS1 | -0.5149 | 0.0792 | 0.5440 | -0.6416 |
| m-GGA-MS2 | -0.5383 | 0.2060 | 0.6152 | -0.9702 |
| m-GGA-revTPSS | -0.7156 | -0.1390 | 0.6044 | -0.7660 |
| m-GGA-TPSS | -0.8334 | -0.1197 | 0.6461 | -0.8387 |
| m-GGA-TPSS-Grimme | -0.9037 | -0.0393 | 0.7877 | -0.7028 |

**Table 60S.** Ranking of 26 DFT functionals based on MAE and RMSE for Exchange-Correlation Energy averaged over four zeolite frameworks (α-quartz, NAT, HEU, and OFF). Functionals are ordered by increasing MAE (lowest to highest). RMSE values are consistently higher than MAE values, reflecting the presence of framework-specific outliers. The largest MAE-RMSE gap is observed for m-GGA-M11-L (MAE = 386.372, RMSE = 45.274), confirming its catastrophic performance and complete unsuitability for exchange-correlation description.

| Rank | Functional | Family | MAE | RMSE |
| --- | --- | --- | --- | --- |
| 1 | m-GGA-M06-L | meta-GGA | 0.275 | 15.574 |
| 2 | m-GGA-M11-L | meta-GGA | 0.327 | 45.274 |
| 3 | m-GGA-MS0 | meta-GGA | 0.890 | 13.302 |
| 4 | m-GGA-MS2 | meta-GGA | 0.970 | 11.163 |
| 5 | m-GGA-TPSS-Grimme | meta-GGA | 0.703 | 13.265 |
| 6 | m-GGA-revTPSS | meta-GGA | 0.766 | 8.994 |
| 7 | m-GGA-TPSS | meta-GGA | 0.839 | 11.038 |
| 8 | m-GGA-MS1 | meta-GGA | 0.642 | 10.457 |
| 9 | LDA-PWC | LDA | 0.446 | 9.783 |
| 10 | LDA-VWN | LDA | 0.378 | 9.410 |
| 11 | LDA-PWC-OBS | LDA | 0.292 | 9.259 |
| 12 | LDA-VWN-OBS | LDA | 0.352 | 9.734 |
| 13 | GGA-BLYP-TS | GGA | 0.484 | 8.091 |
| 14 | GGA-HCTH | GGA | 4.703 | 10.166 |
| 15 | GGA-PW91-OBS | GGA | 4.339 | 8.532 |
| 16 | GGA-PW91 | GGA | 4.851 | 8.771 |
| 17 | GGA-PBE | GGA | 5.203 | 9.109 |
| 18 | GGA-BP | GGA | 5.243 | 10.043 |
| 19 | GGA-VWN-BP | GGA | 5.164 | 10.132 |
| 20 | GGA-BLYP-Grimme | GGA | 4.224 | 9.610 |
| 21 | GGA-PBE-Grimme | GGA | 3.791 | 10.772 |
| 22 | GGA-PBE-TS | GGA | 10.169 | 8.653 |
| 23 | GGA-RPBE | GGA | 6.848 | 13.004 |
| 24 | GGA-BOP | GGA | 6.940 | 14.067 |
| 25 | GGA-BLYP | GGA | 6.166 | 10.224 |
| 26 | m-GGA-M11-L | meta-GGA | 327.000 | 45.274 |

Note: The apparent high MAE for some functionals reflects the absolute magnitude of exchange-correlation energies; these values should be interpreted relative to the scale of the property.

**Table 61S.** The Best Functionals (Lowest MAE) Based on MAE for Exchange-Correlation Energy

| Rank | Functional | Family | MAE | Note |
| --- | --- | --- | --- | --- |
| 1 | m-GGA-M06-L | meta-GGA | 0.275 | Best overall – exceptional accuracy |
| 2 | m-GGA-M11-L | meta-GGA | 0.327 | Very good – second best |
| 3 | LDA-PWC-OBS | LDA | 0.292 | Best LDA for XC energy |
| 4 | LDA-VWN-OBS | LDA | 0.352 | Excellent LDA performer |
| 5 | LDA-VWN | LDA | 0.378 | Very good |
| 6 | LDA-PWC | LDA | 0.446 | Good |
| 7 | GGA-BLYP-TS | GGA | 0.484 | Best GGA for XC energy |
| 8 | m-GGA-MS1 | meta-GGA | 0.642 | Good |
| 9 | m-GGA-TPSS-Grimme | meta-GGA | 0.703 | Acceptable |
| 10 | m-GGA-revTPSS | meta-GGA | 0.766 | Acceptable |

**Table 62S.** The Worst Functionals (Highest MAE) Based on MAE for Exchange-Correlation Energy

| Rank | Functional | Family | MAE | Note |
| --- | --- | --- | --- | --- |
| 26 | GGA-BLYP | GGA | 6.166 | Poor |
| 25 | GGA-RPBE | GGA | 6.848 | Poor |
| 24 | GGA-BOP | GGA | 6.940 | Poor |
| 23 | GGA-PBE-TS | GGA | 10.169 | Very poor – TS correction harmful |
| 22 | GGA-PBE | GGA | 5.203 | Moderate-poor |
| 21 | GGA-BP | GGA | 5.243 | Moderate-poor |
| 20 | GGA-VWN-BP | GGA | 5.164 | Moderate-poor |
| 19 | GGA-PW91 | GGA | 4.851 | Moderate |
| 18 | GGA-PW91-OBS | GGA | 4.339 | Moderate |
| 17 | GGA-HCTH | GGA | 4.703 | Moderate |

*Note: GGA-PBE-TS (10.169) shows anomalously high MAE, indicating that the TS dispersion correction severely perturbs the exchange-correlation description for this functional.*

**Table 63S.** Summary by Functional Family based on MAE for Exchange-Correlation Energy

| Family | Best Representative | MAE | Worst Representative | MAE |
| --- | --- | --- | --- | --- |
| meta-GGA | m-GGA-M06-L | 0.275 | m-GGA-M11-L | 327.000 |
| LDA | LDA-PWC-OBS | 0.292 | LDA-PWC | 0.446 |
| GGA | GGA-BLYP-TS | 0.484 | GGA-PBE-TS | 10.169 |

**Table 64S.** Final Summary based on MAE for Exchange-Correlation Energy

| Criterion | Best Functional | Error Value | Worst Functional | Error Value |
| --- | --- | --- | --- | --- |
| Overall (all 26 functionals) | m-GGA-M06-L | 0.275 | GGA-PBE-TS | 10.169 |
| Best meta-GGA | m-GGA-M06-L | 0.275 | m-GGA-M11-L | 327.000 |
| Best GGA | GGA-BLYP-TS | 0.484 | GGA-PBE-TS | 10.169 |
| Best LDA | LDA-PWC-OBS | 0.292 | LDA-PWC | 0.446 |
| Most reliable overall | m-GGA-M06-L | 0.275 | — | — |

**Table 65S.** Comparison of Exchange-Correlation Energy Error Across Functional Families

| Family | Average MAE | Best MAE | Worst MAE |
| --- | --- | --- | --- |
| meta-GGA | 47.38 | 0.275 | 327.000 |
| LDA | 0.37 | 0.292 | 0.446 |
| GGA | 5.45 | 0.484 | 10.169 |

*Note: The high average for meta-GGA is heavily influenced by m-GGA-M11-L (327). Excluding this outlier, the meta-GGA average is 0.71.*

**3.8.5S. Jellium Energy**

Jellium energy describes the behavior of a uniform electron gas and serves as a fundamental benchmark for exchange‑correlation functionals. This criterion tests the functional's performance in the homogeneous limit, which is indirectly relevant to the nearly‑free electron behavior in extended solids. As shown in **Table 66S** and **Table 67S** (ranking by MAE), GGA functionals dominate the top positions for jellium energy. GGA‑PW91‑OBS (MAE = 0.402, rank 1) achieves the best performance, followed by GGA‑PBE‑Grimme (MAE = 0.696, rank 2), GGA‑PW91 (MAE = 0.757, rank 3), GGA‑VWN‑BP (MAE = 1.027, rank 4), and GGA‑BP (MAE = 1.083, rank 5). The excellent performance of GGA‑PW91‑OBS (MAE = 0.402) confirms the effectiveness of the Tkatchenko‑Scheffler dispersion correction for the uniform electron gas limit. LDA‑PWC (MAE = 4.865, rank 6) and LDA‑VWN (MAE = 4.940, rank 7) show moderate performance, which is expected since LDA is exact for the uniform electron gas. m‑GGA‑M06‑L (MAE = 2.448, rank 10) is the best meta‑GGA functional for this metric. **Table 68S** lists the ten best functionals for jellium energy. The top nine are all GGA functionals, confirming their superiority for the homogeneous electron gas limit. **Table 69S** lists the ten worst functionals for jellium energy. m‑GGA‑MS2 (MAE = 14.747, rank 26) and m‑GGA‑MS0 (MAE = 12.061, rank 25) are catastrophic, followed by m‑GGA‑TPSS‑Grimme (MAE = 11.224, rank 24). The poor performance of these meta‑GGA functionals suggests that they may over‑parameterize the uniform electron gas limit. **Table 70S** summarizes performance by functional family. The GGA family shows the best overall performance (best: GGA‑PW91‑OBS, MAE = 0.402; worst: GGA‑BOP, MAE = 8.931). The LDA family shows intermediate performance (best: LDA‑PWC, 4.865; worst: LDA‑VWN‑OBS, 3.770). The meta‑GGA family shows the highest average errors (best: m‑GGA‑M06‑L, 2.448; worst: m‑GGA‑MS2, 14.747). **Table 71S** provides the final summary. Overall, GGA‑PW91‑OBS is the best functional for jellium energy (MAE = 0.402), while m‑GGA‑MS2 is the worst (MAE = 14.747). The best GGA functional is GGA‑PW91‑OBS (0.402), the best meta‑GGA is m‑GGA‑M06‑L (2.448), and the best LDA is LDA‑PWC (4.865). **Table 72S** compares jellium energy error across families. GGA functionals show the lowest average MAE (2.78) and the widest performance range. The meta‑GGA functionals show the highest average MAE (7.47). GGA functionals, particularly dispersion‑corrected variants (PW91‑OBS, PBE‑Grimme), excel at describing jellium (uniform electron gas) behavior. This is consistent with their parameterization for condensed‑phase systems. The poor performance of meta‑GGA functionals (average MAE = 7.47) for jellium energy is notable, given their excellence for kinetic and exchange‑correlation energies. This suggests that meta‑GGA functionals may over‑parameterize the uniform electron gas limit.

**Table 66S. Percent Relative Jellium Energy errors (PRE) (degrees) for 26 DFT functionals on QUA, NAT, HEU, and OFF zeolites.**

| FUNCTIONALS | Nat | HEU | OFF | Qua |
| --- | --- | --- | --- | --- |
| LDA-PWC | 1.2737 | 15.1663 | 10.5919 | 4.8645 |
| LDA-PWC-OBS | 1.8125 | -12.7210 | 0.6717 | 3.7287 |
| LDA-VWN | 1.3769 | 2.9640 | 10.7793 | 4.9401 |
| LDA-VWN-OBS | 1.9141 | 6.5511 | 0.8622 | 3.7702 |
| GGA-PW91 | -4.9686 | -11.7313 | 11.1915 | -0.7568 |
| GGA-PW91-OBS | -4.3295 | -15.9999 | 6.6384 | 0.4015 |
| GGA-BP | -6.4365 | -10.8923 | 14.4935 | -1.0828 |
| GGA-PBE | -6.0192 | -14.8101 | 7.3092 | -1.7036 |
| GGA-PBE-TS | -5.4584 | -23.7882 | -5.3805 | 1.6173 |
| GGA-PBE-Grimme | -5.1811 | -23.6499 | 47.5557 | 0.6955 |
| GGA-BLYP | -7.9223 | -9.4490 | 10.3725 | -6.5846 |
| GGA-BLYP-TS | -2.3099 | -27.3195 | -13.6349 | -1.6526 |
| GGA-BLYP-Grimme | -7.0254 | -22.5792 | -0.6917 | -1.6890 |
| GGA-BOP | -12.1001 | -9.5996 | 11.4145 | -8.9307 |
| GGA-VWN-BP | -6.3993 | -10.9211 | 14.1299 | -1.0265 |
| GGA-RPBE | -8.3284 | -14.2221 | 8.6324 | -7.9509 |
| GGA-HCTH | -3.5043 | -0.3848 | 12.1824 | -5.4250 |
| GGA-PBEsol | -3.2604 | -13.3106 | 13.0065 | 3.3341 |
| m-GGA-M06-L | -23.5795 | -5.7372 | 8.3962 | -2.4475 |
| m-GGA-M11-L | 14.1924 | 33.8369 | 25.3512 | 6.6559 |
| m-GGA-MS0 | -24.7635 | -2.4777 | 10.7661 | -12.0608 |
| m-GGA-MS1 | -22.1679 | -14.2857 | 8.4101 | -2.8773 |
| m-GGA-MS2 | -18.1462 | -3.6659 | 11.9765 | -14.7473 |
| m-GGA-revTPSS | -21.8943 | 0.0000 | 11.8989 | -5.3992 |
| m-GGA-TPSS | -21.5512 | -7.3919 | 12.8536 | -3.0961 |
| m-GGA-TPSS-Grimme | -27.3946 | -8.8380 | 6.2476 | -11.2241 |

**Table 67S.** Ranking of 26 DFT functionals based on MAE and RMSE for Jellium Energy averaged over four zeolite frameworks (α-quartz, NAT, HEU, and OFF). Functionals are ordered by increasing MAE (lowest to highest). RMSE values are consistently higher than MAE values, reflecting the presence of framework-specific outliers. The largest MAE-RMSE gap is observed for m-GGA-MS0 (MAE = 12.061, RMSE = 24.764), confirming its catastrophic performance and complete unsuitability for jellium energy description.

| Rank | Functional | Family | MAE | RMSE |
| --- | --- | --- | --- | --- |
| 1 | GGA-PBE-Grimme | GGA | 0.696 | 5.181 |
| 2 | GGA-PBE-TS | GGA | 1.617 | 5.458 |
| 3 | GGA-HCTH | GGA | 5.425 | 3.504 |
| 4 | LDA-PWC | LDA | 4.865 | 1.274 |
| 5 | LDA-VWN | LDA | 4.940 | 1.377 |
| 6 | m-GGA-M11-L | meta-GGA | 6.656 | 14.192 |
| 7 | GGA-PBE | GGA | 1.704 | 6.019 |
| 8 | GGA-PW91 | GGA | 0.757 | 4.969 |
| 9 | LDA-VWN-OBS | LDA | 3.770 | 1.914 |
| 10 | LDA-PWC-OBS | LDA | 3.729 | 1.813 |
| 11 | GGA-PBEsol | GGA | 3.334 | 3.260 |
| 12 | GGA-PW91-OBS | GGA | 0.402 | 4.330 |
| 13 | GGA-BP | GGA | 1.083 | 6.436 |
| 14 | GGA-VWN-BP | GGA | 1.027 | 6.399 |
| 15 | GGA-BLYP | GGA | 6.585 | 7.922 |
| 16 | GGA-RPBE | GGA | 7.951 | 8.328 |
| 17 | GGA-BOP | GGA | 8.931 | 12.100 |
| 18 | m-GGA-M06-L | meta-GGA | 2.448 | 23.580 |
| 19 | m-GGA-revTPSS | meta-GGA | 5.399 | 21.894 |
| 20 | m-GGA-TPSS | meta-GGA | 3.096 | 21.551 |
| 21 | m-GGA-MS1 | meta-GGA | 2.877 | 22.168 |
| 22 | GGA-BLYP-Grimme | GGA | 1.689 | 7.025 |
| 23 | m-GGA-MS2 | meta-GGA | 14.747 | 18.146 |
| 24 | m-GGA-MS0 | meta-GGA | 12.061 | 24.764 |
| 25 | GGA-BLYP-TS | GGA | 1.653 | 2.310 |
| 26 | m-GGA-TPSS-Grimme | meta-GGA | 11.224 | 27.395 |

*Note: GGA-PW91-OBS (0.402) and GGA-PW91 (0.757) show surprisingly low MAE, indicating excellent jellium energy description.*

**Table 68S.** The Best Functionals (Lowest MAE) Based on MAE for Jellium Energy

| Rank | Functional | Family | MAE | Note |
| --- | --- | --- | --- | --- |
| 1 | GGA-PW91-OBS | GGA | 0.402 | Best overall – exceptional accuracy |
| 2 | GGA-PBE-Grimme | GGA | 0.696 | Excellent – second best |
| 3 | GGA-PW91 | GGA | 0.757 | Very good |
| 4 | GGA-VWN-BP | GGA | 1.027 | Good |
| 5 | GGA-BP | GGA | 1.083 | Good |
| 6 | GGA-BLYP-TS | GGA | 1.653 | Good |
| 7 | GGA-PBE-TS | GGA | 1.617 | Good |
| 8 | GGA-BLYP-Grimme | GGA | 1.689 | Good |
| 9 | GGA-PBE | GGA | 1.704 | Good |
| 10 | m-GGA-M06-L | meta-GGA | 2.448 | Moderate for meta-GGA |

**Table 69S.** The Worst Functionals (Highest MAE) Based on MAE for Jellium Energy

| Rank | Functional | Family | MAE | Note |
| --- | --- | --- | --- | --- |
| 26 | m-GGA-MS2 | meta-GGA | 14.747 | Catastrophic – NEVER use |
| 25 | m-GGA-MS0 | meta-GGA | 12.061 | Very poor |
| 24 | m-GGA-TPSS-Grimme | meta-GGA | 11.224 | Very poor – Grimme correction detrimental |
| 23 | GGA-BOP | GGA | 8.931 | Poor |
| 22 | GGA-RPBE | GGA | 7.951 | Poor |
| 21 | m-GGA-M11-L | meta-GGA | 6.656 | Poor |
| 20 | GGA-BLYP | GGA | 6.585 | Poor |
| 19 | m-GGA-revTPSS | meta-GGA | 5.399 | Moderate-poor |
| 18 | GGA-HCTH | GGA | 5.425 | Moderate-poor |
| 17 | LDA-VWN | LDA | 4.940 | Moderate for LDA |

**Table 70S.** Summary by Functional Family based on MAE for Jellium Energy

| Family | Best Representative | MAE | Worst Representative | MAE |
| --- | --- | --- | --- | --- |
| GGA | GGA-PW91-OBS | 0.402 | GGA-BOP | 8.931 |
| LDA | LDA-PWC | 4.865 | LDA-VWN-OBS | 3.770 |
| meta-GGA | m-GGA-M06-L | 2.448 | m-GGA-MS2 | 14.747 |

**Table 71S.** Final Summary based on MAE for Jellium Energy

| Criterion | Best Functional | Error Value | Worst Functional | Error Value |
| --- | --- | --- | --- | --- |
| Overall (all 26 functionals) | GGA-PW91-OBS | 0.402 | m-GGA-MS2 | 14.747 |
| Best GGA | GGA-PW91-OBS | 0.402 | GGA-BOP | 8.931 |
| Best meta-GGA | m-GGA-M06-L | 2.448 | m-GGA-MS2 | 14.747 |
| Best LDA | LDA-PWC | 4.865 | LDA-VWN-OBS | 3.770 |
| Most reliable overall | GGA-PW91-OBS | 0.402 | — | — |

**Table 72S.** Comparison of Jellium Energy Error Across Functional Families

| Family | Average MAE | Best MAE | Worst MAE |
| --- | --- | --- | --- |
| GGA | 2.78 | 0.402 | 8.931 |
| LDA | 4.33 | 3.729 | 4.940 |
| meta-GGA | 7.47 | 2.448 | 14.747 |

**3.8.6S. Binding Energy**

Binding energy (per atom) is a critical thermodynamic property that determines the stability of the zeolite framework relative to isolated atoms. This metric is essential for assessing the energetic cost of forming the framework from its constituent elements. As shown in **Table 73S** and **Table 74S** (ranking by MAE), meta‑GGA functionals dominate the top positions for binding energy. m‑GGA‑MS0 (MAE = 0.038 Kcal/mol, rank 1) achieves exceptional accuracy, followed by m‑GGA‑M11‑L (MAE = 0.066, rank 2), GGA‑PW91‑OBS (MAE = 0.147, rank 3), m‑GGA‑MS1 (MAE = 0.147, rank 4), and m‑GGA‑TPSS‑Grimme (MAE = 0.173, rank 5). The excellent performance of m‑GGA‑MS0 (0.038) is particularly striking given its catastrophic structural errors (bond length MAE = 3.120 Å, rank 26). This stark contrast reinforces a central message: excellent energetic accuracy does not guarantee structural fidelity. GGA‑PW91‑OBS (MAE = 0.147) is the best GGA functional for binding energy, followed by GGA‑BLYP‑Grimme (MAE = 0.174), GGA‑PW91 (MAE = 0.189), and GGA‑BLYP‑TS (MAE = 0.484). LDA functionals show moderate performance, with LDA‑VWN‑OBS (MAE = 0.139) and LDA‑PWC‑OBS (MAE = 0.191) being the best. **Table 75S** lists the ten best functionals for binding energy. The top ten includes six meta‑GGA, three GGA, and one LDA functional. **Table 76S** lists the ten worst functionals for binding energy. GGA‑BLYP‑TS (MAE = 1.542 Kcal/mol, rank 26) and GGA‑PBE‑TS (MAE = 2.088, rank 25) are catastrophic. m‑GGA‑MS2 (MAE = 0.864, rank 24) and GGA‑PBEsol (MAE = 0.544, rank 23) also perform poorly. **Table 77S** summarizes performance by functional family. The meta‑GGA family shows the best overall performance (best: m‑GGA‑MS0, MAE = 0.038; worst: m‑GGA‑MS2, MAE = 0.864). The GGA family shows the widest range (best: GGA‑PW91‑OBS, 0.147; worst: GGA‑BLYP‑TS, 1.542). The LDA family shows intermediate performance (best: LDA‑VWN‑OBS, 0.139; worst: LDA‑PWC, 0.331). **Table 78S** provides the final summary. Overall, m‑GGA‑MS0 is the best functional for binding energy (MAE = 0.038 Kcal/mol), while GGA‑BLYP‑TS is the worst (MAE = 1.542). The best GGA functional is GGA‑PW91‑OBS (0.147), the best meta‑GGA is m‑GGA‑MS0 (0.038), and the best LDA is LDA‑VWN‑OBS (0.139). **Table 79S** compares binding energy error across families. The meta-GGA family shows the lowest average MAE (0.31 Kcal/mol) and the best-case performance (0.038). The GGA family shows the highest average MAE (0.54) and the widest range. The exceptional binding energy accuracy of m‑GGA‑MS0 (0.038 Kcal/mol) despite its catastrophic structural errors (bond length MAE = 3.120 Å) is one of the most striking findings of this study. This demonstrates that a functional can be excellent for thermodynamic properties while completely failing for structural properties. Researchers must therefore select functionals based on their primary objective: for accurate binding energies, m‑GGA‑MS0 is excellent, but for accurate structures, it should be avoided entirely.

**Table 73S. Percent Relative Binding Energy errors (PRE) (degrees) for 26 DFT functionals on QUA, NAT, HEU, and OFF zeolites.**

| FUNCTIONALS | Nat | HEU | OFF | Qua |
| --- | --- | --- | --- | --- |
| LDA-PWC | 0.0326 | -0.0882 | 1.2026 | 0.8331 |
| LDA-PWC-OBS | 0.0385 | 0.1360 | 1.2261 | 0.9609 |
| LDA-VWN | 0.0323 | 0.0746 | 1.2083 | 0.8329 |
| LDA-VWN-OBS | 0.0385 | -0.0797 | 1.2315 | 0.9612 |
| GGA-PW91 | 0.1667 | 0.1294 | 1.1239 | 0.7150 |
| GGA-PW91-OBS | 0.1530 | 0.1206 | 1.1162 | 0.7596 |
| GGA-BP | 0.2007 | 0.1557 | 1.1587 | 0.7334 |
| GGA-PBE | 0.1986 | 0.1450 | 1.1072 | 0.7686 |
| GGA-PBE-TS | 0.1840 | 0.1411 | 1.0970 | -8.2901 |
| GGA-PBE-Grimme | 0.1760 | 0.1458 | 0.6864 | 1.0013 |
| GGA-BLYP | 0.2964 | 0.2432 | 1.1665 | 0.7739 |
| GGA-BLYP-TS | 0.1257 | 0.2380 | 1.1912 | 1.5415 |
| GGA-BLYP-Grimme | 0.2509 | 0.1995 | 1.1034 | 1.0443 |
| GGA-BOP | 0.3549 | 0.3046 | 1.2144 | 0.8111 |
| GGA-VWN-BP | 0.2182 | 0.1549 | 1.1611 | 0.7223 |
| GGA-RPBE | 0.3444 | 0.2686 | 1.1723 | 0.8637 |
| GGA-HCTH | 0.1262 | 0.1508 | 1.3162 | 0.4656 |
| GGA-PBEsol | 0.0984 | 0.0864 | 1.1131 | 0.7838 |
| m-GGA-M06-L | 0.0735 | 0.1539 | 1.0119 | 0.5106 |
| m-GGA-M11-L | 0.2290 | 0.6827 | 1.8612 | 0.6303 |
| m-GGA-MS0 | 0.0607 | 0.0145 | 0.8491 | 0.0379 |
| m-GGA-MS1 | 0.0868 | 0.0609 | 0.8685 | 0.5027 |
| m-GGA-MS2 | 0.0654 | 0.0587 | 0.5406 | -0.5644 |
| m-GGA-revTPSS | 0.1259 | 0.0580 | 0.9683 | 0.6673 |
| m-GGA-TPSS | 0.1009 | 0.0545 | 0.8014 | 0.4554 |
| m-GGA-TPSS-Grimme | 0.1138 | -0.1643 | 0.7862 | 0.1697 |

**Table 74S**. Ranking of 26 DFT functionals based on MAE and RMSE for Binding Energy (Kcal/mol) averaged over four zeolite frameworks (α-quartz, NAT, HEU, and OFF). Functionals are ordered by increasing MAE (lowest to highest). RMSE values are consistently higher than MAE values, reflecting the presence of framework-specific outliers. The largest MAE-RMSE gap is observed for GGA-BLYP-TS (MAE = 1.542, RMSE = 4.128), confirming its unstable and inconsistent performance.

| Rank | Functional | Family | MAE (Kcal/mol) | RMSE (Kcal/mol) |
| --- | --- | --- | --- | --- |
| 1 | m-GGA-MS0 | meta-GGA | 0.038 | 0.849 |
| 2 | GGA-PBE-Grimme | GGA | 0.376 | 1.646 |
| 3 | GGA-HCTH | GGA | 0.359 | 1.146 |
| 4 | GGA-PW91 | GGA | 0.189 | 1.077 |
| 5 | GGA-PBE | GGA | 0.364 | 1.078 |
| 6 | GGA-PW91-OBS | GGA | 0.147 | 1.085 |
| 7 | GGA-PBEsol | GGA | 0.544 | 1.038 |
| 8 | m-GGA-M06-L | meta-GGA | 0.232 | 1.289 |
| 9 | m-GGA-MS1 | meta-GGA | 0.147 | 0.958 |
| 10 | GGA-BLYP-Grimme | GGA | 0.174 | 1.214 |
| 11 | GGA-BP | GGA | 0.386 | 1.099 |
| 12 | GGA-VWN-BP | GGA | 0.359 | 1.118 |
| 13 | GGA-BOP | GGA | 0.298 | 1.202 |
| 14 | GGA-RPBE | GGA | 0.344 | 1.119 |
| 15 | m-GGA-revTPSS | meta-GGA | 0.232 | 1.048 |
| 16 | m-GGA-TPSS | meta-GGA | 0.200 | 0.971 |
| 17 | GGA-BLYP | GGA | 0.281 | 1.164 |
| 18 | m-GGA-TPSS-Grimme | meta-GGA | 0.173 | 1.106 |
| 19 | GGA-PBE-TS | GGA | 2.088 | 3.659 |
| 20 | LDA-PWC | LDA | 0.331 | 1.204 |
| 21 | LDA-VWN | LDA | 0.278 | 1.200 |
| 22 | LDA-PWC-OBS | LDA | 0.191 | 1.213 |
| 23 | LDA-VWN-OBS | LDA | 0.139 | 1.216 |
| 24 | m-GGA-M11-L | meta-GGA | 0.066 | 0.747 |
| 25 | GGA-BLYP-TS | GGA | 1.542 | 4.128 |
| 26 | m-GGA-MS2 | meta-GGA | 0.864 | 1.360 |

*Note: Some MAE values appear very small (e.g., m-GGA-MS0: 0.038 Kcal/mol), indicating exceptional accuracy for this specific metric. However, these should be interpreted in the context of overall functional performance.*

**Table 75S.** The Best Functionals (Lowest MAE) Based on MAE for Binding Energy

| Rank | Functional | Family | MAE (Kcal/mol) | Note |
| --- | --- | --- | --- | --- |
| 1 | m-GGA-MS0 | meta-GGA | 0.038 | Best overall – exceptional accuracy |
| 2 | m-GGA-M11-L | meta-GGA | 0.066 | Excellent – second best |
| 3 | GGA-PW91-OBS | GGA | 0.147 | Very good – best GGA |
| 4 | m-GGA-MS1 | meta-GGA | 0.147 | Very good |
| 5 | m-GGA-TPSS-Grimme | meta-GGA | 0.173 | Good |
| 6 | GGA-BLYP-Grimme | GGA | 0.174 | Good |
| 7 | GGA-PW91 | GGA | 0.189 | Good |
| 8 | LDA-PWC-OBS | LDA | 0.191 | Good for LDA |
| 9 | m-GGA-TPSS | meta-GGA | 0.200 | Good |
| 10 | m-GGA-M06-L | meta-GGA | 0.232 | Acceptable |

**Table 76S.** The Worst Functionals (Highest MAE) Based on MAE for Binding Energy

| Rank | Functional | Family | MAE (Kcal/mol) | Note |
| --- | --- | --- | --- | --- |
| 26 | GGA-BLYP-TS | GGA | 1.542 | Catastrophic – NEVER use |
| 25 | GGA-PBE-TS | GGA | 2.088 | Very poor – TS correction harmful |
| 24 | m-GGA-MS2 | meta-GGA | 0.864 | Moderate-poor |
| 23 | GGA-PBEsol | GGA | 0.544 | Moderate |
| 22 | GGA-BP | GGA | 0.386 | Moderate |
| 21 | GGA-PBE-Grimme | GGA | 0.376 | Moderate |
| 20 | GGA-PBE | GGA | 0.364 | Moderate |
| 19 | GGA-HCTH | GGA | 0.359 | Moderate |
| 18 | GGA-VWN-BP | GGA | 0.359 | Moderate |
| 17 | GGA-RPBE | GGA | 0.344 | Moderate |

*Note: The high MAE for GGA-PBE-TS (2.088) indicates that the TS dispersion correction severely degrades binding energy prediction for this functional.*

**Table 77S.** Summary by Functional Family based on MAE for Binding Energy

| Family | Best Representative | MAE (Kcal/mol) | Worst Representative | MAE (Kcal/mol) |
| --- | --- | --- | --- | --- |
| meta-GGA | m-GGA-MS0 | 0.038 | m-GGA-MS2 | 0.864 |
| GGA | GGA-PW91-OBS | 0.147 | GGA-BLYP-TS | 1.542 |
| LDA | LDA-VWN-OBS | 0.139 | LDA-PWC | 0.331 |

**Table 78S.** Final Summary based on MAE for Binding Energy

| Criterion | Best Functional | Error Value (Kcal/mol) | Worst Functional | Error Value (Kcal/mol) |
| --- | --- | --- | --- | --- |
| Overall (all 26 functionals) | m-GGA-MS0 | 0.038 | GGA-BLYP-TS | 1.542 |
| Best meta-GGA | m-GGA-MS0 | 0.038 | m-GGA-MS2 | 0.864 |
| Best GGA | GGA-PW91-OBS | 0.147 | GGA-BLYP-TS | 1.542 |
| Best LDA | LDA-VWN-OBS | 0.139 | LDA-PWC | 0.331 |
| Most reliable overall | GGA-HCTH | 0.359 | — | — |

**Table 79S.** Comparison of Binding Energy Error Across Functional Families

| Family | Average MAE (Kcal/mol) | Best MAE (Kcal/mol) | Worst MAE (Kcal/mol) |
| --- | --- | --- | --- |
| meta-GGA | 0.31 | 0.038 | 0.864 |
| GGA | 0.54 | 0.147 | 1.542 |
| LDA | 0.23 | 0.139 | 0.331 |

**3.8.7S. Total Energy**

Total energy is the most fundamental output of any DFT calculation, and its accuracy directly affects all derived properties. The RMSE values reported here reflect the consistency of total energy predictions across the four zeolite frameworks. As shown in **Table 80S** and **Table 81S** (ranking by MAE), nearly all functionals show excellent total energy MAE values (0.0001–0.0003 eV), making the ranking subtle but meaningful. LDA functionals (LDA‑PWC, LDA‑VWN, LDA‑PWC‑OBS, LDA‑VWN‑OBS) achieve the lowest MAE of 0.0001 eV, but this reflects systematic error cancellation rather than physical accuracy. GGA‑PBE‑Grimme (MAE = 0.0002 eV, RMSE = 0.0011 eV) has the lowest RMSE, indicating the most consistent performance across the four frameworks. **Table 82S** lists the ten best functionals for total energy. LDA functionals occupy the top four positions based on MAE, followed by GGA‑PBE‑Grimme, m‑GGA‑MS0, m‑GGA‑MS2, GGA‑HCTH, m‑GGA‑MS1, and GGA‑PW91. **Table 83S** lists the ten worst functionals for total energy. m‑GGA‑M11‑L (MAE = 0.0014 eV) is the only functional with significantly higher MAE, confirming its catastrophic failure. All other functionals show MAE values between 0.0001-0.0003 eV. **Table 84S** summarizes performance by functional family. The LDA family shows the lowest average MAE (0.0001 eV). The GGA family shows an average MAE of 0.0002 eV. The meta‑GGA family shows the highest average MAE (0.0004 eV), largely due to m‑GGA‑M11‑L. **Table 85S** provides the final summary. Overall, LDA‑PWC has the lowest MAE (0.0001 eV), while m‑GGA‑M11‑L has the highest (0.0014 eV). The best GGA functional is GGA‑PBE‑Grimme (0.0002 eV), the best meta‑GGA is m‑GGA‑MS0 (0.0002 eV), and the best LDA is LDA‑PWC (0.0001 eV). GGA‑HCTH (0.0002 eV) remains the most reliable overall. **Table 86S** compares total energy error across families. LDA functionals show the lowest average MAE (0.0001 eV) and narrowest range. The meta‑GGA functionals show the highest average MAE (0.0004 eV) and the widest range. All functionals show excellent total energy MAE values (0.0001–0.0003 eV), with LDA functionals having the lowest numerical MAE due to error cancellation. The RMSE values provide additional insight: GGA‑PBE‑Grimme has the lowest RMSE (0.0011 eV), indicating the most consistent performance across the four frameworks. m‑GGA‑M11‑L stands out as the only functional with significantly higher MAE (0.0014 eV) and RMSE (0.0037 eV), confirming its catastrophic failure.

**Table 80S. Percent Relative Total Energy errors (PRE) (degrees) for 26 DFT functionals on QUA, NAT, HEU, and OFF zeolites.**

| FUNCTIONALS | Nat | HEU | OFF | Qua |
| --- | --- | --- | --- | --- |
| LDA-PWC | 0.0001 | -0.0002 | 0.0022 | 0.0015 |
| LDA-PWC-OBS | 0.0001 | 0.0003 | 0.0022 | 0.0018 |
| LDA-VWN | 0.0001 | 0.0001 | 0.0022 | 0.0015 |
| LDA-VWN-OBS | 0.0001 | -0.0001 | 0.0023 | 0.0018 |
| GGA-PW91 | 0.0003 | 0.0002 | 0.0018 | 0.0012 |
| GGA-PW91-OBS | 0.0003 | 0.0002 | 0.0018 | 0.0012 |
| GGA-BP | 0.0027 | 0.0003 | 0.0018 | -0.0012 |
| GGA-PBE | 0.0003 | 0.0002 | 0.0018 | 0.0012 |
| GGA-PBE-TS | 0.0003 | 0.0002 | 0.0018 | 0.0015 |
| GGA-PBE-Grimme | 0.0003 | 0.0002 | 0.0011 | 0.0016 |
| GGA-BLYP | 0.0005 | 0.0004 | 0.0018 | 0.0012 |
| GGA-BLYP-TS | 0.0002 | 0.0004 | 0.0019 | 0.0025 |
| GGA-BLYP-Grimme | 0.0004 | 0.0003 | 0.0017 | 0.0017 |
| GGA-BOP | 0.0005 | 0.0005 | 0.0018 | 0.0012 |
| GGA-VWN-BP | -0.0020 | 0.0003 | 0.0018 | 0.0011 |
| GGA-RPBE | 0.0005 | 0.0004 | 0.0018 | 0.0013 |
| GGA-HCTH | 0.0002 | 0.0002 | 0.0020 | 0.0007 |
| GGA-PBEsol | 0.0002 | 0.0002 | 0.0019 | 0.0013 |
| m-GGA-M06-L | 0.0002 | 0.0003 | 0.0022 | 0.0011 |
| m-GGA-M11-L | 0.0005 | 0.0014 | 0.0037 | 0.0013 |
| m-GGA-MS0 | 0.0001 | 0.0000 | 0.0020 | 0.0001 |
| m-GGA-MS1 | 0.0002 | 0.0001 | 0.0019 | 0.0011 |
| m-GGA-MS2 | 0.0002 | 0.0001 | 0.0012 | -0.0013 |
| m-GGA-revTPSS | 0.0002 | 0.0001 | 0.0019 | 0.0013 |
| m-GGA-TPSS | 0.0002 | 0.0001 | 0.0019 | 0.0011 |
| m-GGA-TPSS-Grimme | 0.0003 | -0.0004 | 0.0019 | 0.0004 |

**Table 81S.** Ranking of 26 DFT functionals based on MAE and RMSE for Total Energy (eV) averaged over four zeolite frameworks (α-quartz, NAT, HEU, and OFF). Functionals are ordered by increasing MAE (lowest to highest). RMSE values are consistently higher than MAE values, reflecting the presence of framework-specific outliers. The largest MAE-RMSE gap is observed for m-GGA-M11-L (MAE = 0.0014, RMSE = 0.0037), confirming its unstable and inconsistent performance.

| Rank | Functional | Family | MAE (eV) | RMSE (eV) |
| --- | --- | --- | --- | --- |
| 1 | GGA-PBE-Grimme | GGA | 0.0002 | 0.0011 |
| 2 | m-GGA-MS0 | meta-GGA | 0.0002 | 0.0020 |
| 3 | m-GGA-MS2 | meta-GGA | 0.0002 | 0.0012 |
| 4 | GGA-HCTH | GGA | 0.0002 | 0.0020 |
| 5 | m-GGA-MS1 | meta-GGA | 0.0002 | 0.0019 |
| 6 | GGA-PW91 | GGA | 0.0002 | 0.0018 |
| 7 | GGA-PBE | GGA | 0.0002 | 0.0018 |
| 8 | GGA-BP | GGA | 0.0002 | 0.0018 |
| 9 | GGA-PW91-OBS | GGA | 0.0002 | 0.0018 |
| 10 | GGA-VWN-BP | GGA | 0.0002 | 0.0018 |
| 11 | GGA-PBE-TS | GGA | 0.0002 | 0.0018 |
| 12 | GGA-BOP | GGA | 0.0003 | 0.0018 |
| 13 | GGA-RPBE | GGA | 0.0003 | 0.0018 |
| 14 | GGA-BLYP | GGA | 0.0003 | 0.0018 |
| 15 | GGA-BLYP-Grimme | GGA | 0.0002 | 0.0017 |
| 16 | m-GGA-revTPSS | meta-GGA | 0.0002 | 0.0019 |
| 17 | m-GGA-TPSS | meta-GGA | 0.0002 | 0.0019 |
| 18 | GGA-BLYP-TS | GGA | 0.0002 | 0.0019 |
| 19 | LDA-PWC | LDA | 0.0001 | 0.0022 |
| 20 | LDA-VWN | LDA | 0.0001 | 0.0022 |
| 21 | LDA-PWC-OBS | LDA | 0.0001 | 0.0022 |
| 22 | LDA-VWN-OBS | LDA | 0.0001 | 0.0023 |
| 23 | m-GGA-TPSS-Grimme | meta-GGA | 0.0002 | 0.0019 |
| 24 | m-GGA-M06-L | meta-GGA | 0.0002 | 0.0022 |
| 25 | m-GGA-M11-L | meta-GGA | 0.0014 | 0.0037 |
| 26 | GGA-PBE-Grimme | GGA | 0.0002 | 0.0011 |

Note: The apparent low MAE values (0.0001–0.0003 eV) reflect the high precision of DFT total energy calculations. The differences between functionals are subtle but meaningful. The exceptionally low MAE for LDA functionals (0.0001 eV) indicates systematic cancellation of errors rather than physical accuracy.

**Table 82S.** The Best Functionals (Lowest MAE) Based on MAE for Total Energy

| Rank | Functional | Family | MAE (eV) | Note |
| --- | --- | --- | --- | --- |
| 1 | LDA-PWC | LDA | 0.0001 | Lowest MAE – but due to error cancellation |
| 2 | LDA-VWN | LDA | 0.0001 | Excellent – but physically unreliable |
| 3 | LDA-PWC-OBS | LDA | 0.0001 | Excellent for LDA |
| 4 | LDA-VWN-OBS | LDA | 0.0001 | Excellent for LDA |
| 5 | GGA-PBE-Grimme | GGA | 0.0002 | Best GGA for total energy |
| 6 | m-GGA-MS0 | meta-GGA | 0.0002 | Best meta-GGA for total energy |
| 7 | m-GGA-MS2 | meta-GGA | 0.0002 | Very good |
| 8 | GGA-HCTH | GGA | 0.0002 | Very good – consistent performer |
| 9 | m-GGA-MS1 | meta-GGA | 0.0002 | Good |
| 10 | GGA-PW91 | GGA | 0.0002 | Good |

**Table 83S.** The Worst Functionals (Highest MAE) Based on MAE for Total Energy

| Rank | Functional | Family | MAE (eV) | Note |
| --- | --- | --- | --- | --- |
| 26 | m-GGA-M11-L | meta-GGA | 0.0014 | Catastrophic – NEVER use |
| 25 | m-GGA-M06-L | meta-GGA | 0.0002 | Acceptable (not truly worst, but ranks low) |
| 24 | GGA-BLYP-TS | GGA | 0.0002 | Acceptable |
| 23 | GGA-BOP | GGA | 0.0003 | Acceptable |
| 22 | GGA-RPBE | GGA | 0.0003 | Acceptable |
| 21 | GGA-BLYP | GGA | 0.0003 | Acceptable |
| 20 | LDA-VWN-OBS | LDA | 0.0001 | Very good (not truly worst) |

*Note: The ranking of "worst" is subtle here because nearly all functionals show excellent MAE values (0.0001–0.0003 eV). The only functional with significantly higher MAE is m-GGA-M11-L (0.0014 eV).*

**Table 84S.** Summary by Functional Family based on MAE for Total Energy

| Family | Best Representative | MAE (eV) | Worst Representative | MAE (eV) |
| --- | --- | --- | --- | --- |
| LDA | LDA-PWC | 0.0001 | LDA-VWN-OBS | 0.0001 |
| GGA | GGA-PBE-Grimme | 0.0002 | GGA-BOP | 0.0003 |
| meta-GGA | m-GGA-MS0 | 0.0002 | m-GGA-M11-L | 0.0014 |

**Table 85S.** Final Summary based on MAE for Total Energy

| Criterion | Best Functional | Error Value (eV) | Worst Functional | Error Value (eV) |
| --- | --- | --- | --- | --- |
| Overall (all 26 functionals) | LDA-PWC | 0.0001 | m-GGA-M11-L | 0.0014 |
| Best GGA | GGA-PBE-Grimme | 0.0002 | GGA-BOP | 0.0003 |
| Best meta-GGA | m-GGA-MS0 | 0.0002 | m-GGA-M11-L | 0.0014 |
| Best LDA | LDA-PWC | 0.0001 | LDA-VWN-OBS | 0.0001 |
| Most reliable overall | GGA-HCTH | 0.0002 | — | — |

**Table 86S.** Comparison of Total Energy Error Across Functional Families

| Family | Average MAE (eV) | Best MAE (eV) | Worst MAE (eV) |
| --- | --- | --- | --- |
| LDA | 0.0001 | 0.0001 | 0.0001 |
| GGA | 0.0002 | 0.0002 | 0.0003 |
| meta-GGA | 0.0004 | 0.0002 | 0.0014 |

**3.8.8S. Comprehensive Analysis of DFT-D Dispersion Correction Errors**

The percentage relative error (PRE) of DFT-D dispersion corrections, as defined by Tkatchenko and Scheffler (2009), quantifies the magnitude of perturbation introduced by van der Waals corrections relative to the uncorrected reference. This metric directly indicates the degree of improvement or degradation in electronic structure when dispersion corrections are applied. Lower values indicate more physically sound corrections that minimally perturb the electronic structure while effectively capturing dispersion interactions, whereas higher values indicate that the correction significantly alters the electronic structure, which may lead to error cancellation (beneficial for some properties) or systematic degradation (detrimental for others). **Table 87** presents the PRE values for eight selected functionals, ranked from lowest (best) to highest (worst). GGA-PW91-OBS exhibits the lowest PRE (5.42%), indicating excellent compatibility between the Tkatchenko-Scheffler (TS) dispersion correction and the PW91 electronic structure. This functional shows minimal electronic structure perturbation while effectively capturing van der Waals interactions. Consistent with this low error, GGA-PW91-OBS demonstrates outstanding performance across multiple energetic criteria: it ranks 1st in jellium energy (MAE = 0.402), 3rd in binding energy (MAE = 0.147 Kcal/mol), and shows excellent total energy accuracy (MAE = 0.0002 eV). This functional is the preferred choice for dispersion-dominated systems, such as the adsorption of large organic molecules, organophosphorus compounds, or pharmaceutical products on zeolite surfaces. GGA-PBE-TS shows a PRE of 8.82%, indicating good compatibility between the TS correction and PBE. This functional performs well for jellium energy (MAE = 1.617, rank 2) and total energy (MAE = 0.0002 eV). However, its structural performance is moderate (structural score = 0.808, rank 12), and its electrostatic energy is poor (MAE = 47.845, rank 25). The error is acceptable, but the functional should be used with caution for properties sensitive to electrostatic description. LDA-PWC-OBS (13.07%) and LDA-VWN-OBS (13.13%) show moderate PRE values. While these values are acceptable, they indicate that adding dispersion corrections to LDA functionals perturbs the electronic structure more significantly than for GGA-PW91-OBS. LDA functionals show excellent cell volume accuracy (MAE ≈ 1.9–2.1%) but poor cell density accuracy (MAE ≈ 6.4–6.8 g/cm³). The moderate PRE reflects the inherent limitations of LDA rather than the correction quality, and these functionals are not recommended for predictive simulations due to LDA's systematic overbinding. GGA-BLYP-Grimme (15.85%) and GGA-PBE-Grimme (17.56%) exhibit high PRE values, indicating significant electronic structure perturbation. The case of GGA-PBE-Grimme is particularly instructive. Despite its high PRE (17.56%), it ranks 1st in total energy RMSE (0.0011 eV) and 1st in binding energy (2.646 Kcal/mol). This apparent contradiction reveals the PBE-Grimme paradox: its success arises from error cancellation rather than correct physical description. The high perturbation compensates for other inaccuracies in PBE (overbinding, incomplete exchange description) to produce accurate thermodynamic results, but this success is coincidental and likely non‑transferable. GGA-BLYP-Grimme (15.85%) shows moderate structural performance (structural score = 0.795, rank 16) but better than its TS‑corrected counterpart. m-GGA-TPSS-Grimme exhibits a very high PRE of 23.27%, indicating severe electronic structure perturbation. The degradation relative to its uncorrected counterpart is dramatic: the structural rank drops from 4 to 22 (↓18 ranks), kinetic energy MAE increases by 165% (2.263 → 6.009), and jellium energy MAE increases by 262% (3.096 → 11.224). This confirms that meta-GGA functionals are highly sensitive to empirical corrections, and adding Grimme D3 is detrimental across nearly all criteria. GGA-BLYP-TS exhibits the highest PRE (33.04%), indicating catastrophic incompatibility between the TS correction and BLYP. The consequences are severe: the Si–O–Si angle MAE increases by 112% (2.843° → 6.035°), the O–Si–O angle MAE increases by 61% (0.919° → 1.483°), and the binding energy MAE increases by 449% (0.281 → 1.542 Kcal/mol). This functional must be completely avoided for any zeolite simulation, as the TS correction fundamentally disrupts the BLYP electronic structure, producing unphysical results across all metrics. Critical insights emerge from this analysis. First, the Tkatchenko-Scheffler correction is superior to Grimme D3 when applied to appropriately parameterized functionals; GGA-PW91-OBS has the lowest PRE (5.42%) and excellent performance across multiple energetic criteria. Second, the PBE-Grimme paradox demonstrates that a high PRE (17.56%) does not preclude excellent thermodynamic accuracy, but this success stems from error cancellation, not correct physics. Third, meta-GGA functionals are highly sensitive to empirical corrections; m-GGA-TPSS-Grimme shows severe degradation, confirming that Grimme corrections should not be applied to meta-GGA functionals. Fourth, GGA-BLYP-TS is catastrophically unsuitable with a PRE of 33.04% and must be completely avoided. Fifth, the choice of dispersion correction is as important as the choice of functional; even the same base functional (e.g., PBE) can show dramatically different behavior depending on whether the TS (8.82%) or Grimme (17.56%) correction is applied. Practical recommendations based on this analysis are as follows. For dispersion-dominated systems (adsorption of large molecules), GGA-PW91-OBS is recommended due to its lowest PRE (5.42%) and most physically sound correction. For general energy calculations, GGA-PBE-Grimme offers the lowest total energy RMSE, but results should be cross-validated with HCTH or M06-L. For systems requiring structural accuracy, GGA-HCTH with no correction remains the best choice. For meta-GGA-based simulations, no correction should be applied, as the Grimme correction severely degrades performance. For BLYP-based simulations, the TS correction must be avoided entirely, as GGA-BLYP-TS is catastrophic (33.04% error).The percentage relative error (PRE) of DFT-D dispersion corrections, as defined by Tkatchenko and Scheffler (2009), quantifies the magnitude of perturbation introduced by van der Waals corrections relative to the uncorrected reference. **Table 88S** summarizes the PRE values for eight selected functionals, grouped by correction type (TS vs. Grimme D3), while **Table 89S** compares the effect of dispersion corrections on functional performance. As shown in **Table 88S**, the Tkatchenko-Scheffler (TS) correction applied to GGA-PW91-OBS yields the lowest PRE (5.42%), indicating excellent compatibility and minimal electronic structure perturbation. This functional is the preferred choice for dispersion-dominated systems, such as the adsorption of large organic molecules, organophosphorus compounds, or pharmaceutical products on zeolite surfaces. GGA-PBE-TS also shows good compatibility (PRE = 8.82%) and is suitable for general use with caution. In contrast, the TS correction applied to LDA functionals (LDA-PWC-OBS and LDA-VWN-OBS) shows moderate PRE values (~13%), but these functionals are not recommended due to LDA's inherent overbinding and error cancellation. Most critically, GGA-BLYP-TS exhibits a catastrophic PRE of 33.04% and must be completely avoided. Regarding Grimme D3 corrections, GGA-PBE-Grimme shows a high PRE of 17.56%, yet paradoxically ranks 1st in total energy and binding energy-a phenomenon we term the PBE-Grimme paradox, where success stems from error cancellation rather than correct physics. This functional may be used for energy calculations but requires cross-validation. GGA-BLYP-Grimme (PRE = 15.85%) shows moderate structural performance but is inferior to its uncorrected counterpart. m-GGA-TPSS-Grimme exhibits a very high PRE of 23.27%, with severe degradation across all metrics, confirming that Grimme corrections should not be applied to meta-GGA functionals. **Table 89S** directly compares the effect of dispersion corrections on functional performance. For GGA-PBE, the Grimme correction causes a dramatic drop of 18 ranks (from rank 5 to 23) with a PRE of 17.56%, while the TS correction causes a more modest drop of 7 ranks (from rank 5 to 12) with a PRE of 8.82%. This demonstrates that the choice of dispersion correction is as important as the choice of functional. For m-GGA-TPSS, the Grimme correction causes an equally severe drop of 18 ranks (from rank 4 to 22) with a very high PRE of 23.27%, confirming that meta-GGA functionals are highly sensitive to empirical corrections. For GGA-BLYP, both corrections degrade performance, but the TS correction is catastrophic (drop of 9 ranks with PRE = 33.04%), while the Grimme correction causes a milder drop of 3 ranks (PRE = 15.85%). Several critical insights emerge from this analysis. First, the TS correction is superior to Grimme D3 when applied to appropriately parameterized functionals (e.g., GGA-PW91-OBS). Second, the PBE-Grimme paradox demonstrates that a high PRE does not preclude excellent thermodynamic accuracy, but this success stems from error cancellation. Third, meta-GGA functionals are highly sensitive to empirical corrections and should be used without dispersion corrections. Fourth, GGA-BLYP-TS is catastrophically unsuitable and must be completely avoided. Fifth, the choice of dispersion correction is as important as the choice of functional; even the same base functional (e.g., PBE) shows dramatically different behavior with TS (8.82%) versus Grimme (17.56%). For dispersion-dominated systems, use GGA-PW91-OBS. For general energy calculations, GGA-PBE-Grimme offers the lowest total energy RMSE but requires cross-validation. For structural accuracy, GGA-HCTH with no correction remains the best choice. For meta-GGA-based simulations, apply no correction. For BLYP-based simulations, avoid the TS correction entirely.

**Table 87S.** DFT-D Dispersion Correction Errors (PRE) for Selected Functionals

| Rank | Functional | Family | Correction Type | PRE (%) | Quality | Key Observations |
| --- | --- | --- | --- | --- | --- | --- |
| 1 | GGA-PW91-OBS | GGA | TS (Tkatchenko-Scheffler) | 5.42 | Excellent | Most physically sound correction; minimal perturbation, maximal accuracy |
| 2 | GGA-PBE-TS | GGA | TS (Tkatchenko-Scheffler) | 8.82 | Good | Acceptable perturbation; good compatibility |
| 3 | LDA-PWC-OBS | LDA | TS (Tkatchenko-Scheffler) | 13.07 | Moderate | Acceptable but LDA-based; error cancellation present |
| 4 | LDA-VWN-OBS | LDA | TS (Tkatchenko-Scheffler) | 13.13 | Moderate | Acceptable but LDA-based; error cancellation present |
| 5 | GGA-BLYP-Grimme | GGA | Grimme D3 | 15.85 | Moderate-Poor | Significant perturbation; Grimme correction alters electronic structure |
| 6 | GGA-PBE-Grimme | GGA | Grimme D3 | 17.56 | Poor | High perturbation; success from error cancellation, not correct physics |
| 7 | m-GGA-TPSS-Grimme | meta-GGA | Grimme D3 | 23.27 | Very Poor | Severe degradation; meta-GGA is highly sensitive to empirical corrections |
| 8 | GGA-BLYP-TS | GGA | TS (Tkatchenko-Scheffler) | 33.04 | Catastrophic | Complete failure; TS correction fundamentally incompatible with BLYP |

**Table 88S**. Percentage relative error (PRE) for DFT-D dispersion corrections for selected functionals grouped by correction type. Lower PRE values indicate more physically sound corrections. GGA-PW91-OBS shows the lowest error (5.42%), while GGA-BLYP-TS shows catastrophic incompatibility (33.04%).

| Correction Type | Functional | PRE (%) | Quality | Best Used For |
| --- | --- | --- | --- | --- |
| TS (Tkatchenko-Scheffler) | GGA-PW91-OBS | 5.42 | Excellent | Dispersion-dominated systems |
| TS | GGA-PBE-TS | 8.82 | Good | General use with caution |
| TS | LDA-PWC-OBS | 13.07 | Moderate | Not recommended (LDA issues) |
| TS | LDA-VWN-OBS | 13.13 | Moderate | Not recommended (LDA issues) |
| TS | GGA-BLYP-TS | 33.04 | Catastrophic | NEVER USE |
| Grimme D3 | GGA-PBE-Grimme | 17.56 | Poor | Energy calculations (with cross-validation) |
| Grimme D3 | GGA-BLYP-Grimme | 15.85 | Moderate-Poor | Limited use |
| Grimme D3 | m-GGA-TPSS-Grimme | 23.27 | Very Poor | NEVER USE |

**Table 89S.** Comparison of the effect of dispersion corrections on functional performance. The choice of dispersion correction is as important as the choice of functional; even the same base functional (e.g., PBE) shows dramatically different behavior with TS (8.82%) versus Grimme (17.56%). Meta-GGA functionals are highly sensitive to empirical corrections, as evidenced by the severe degradation of m-GGA-TPSS-Grimme (↓18 ranks, PRE = 23.27%).

| Functional | Uncorrected Rank | Corrected Rank | Change | PRE (%) |
| --- | --- | --- | --- | --- |
| GGA-PBE | 5 | 23 (Grimme) | ↓ 18 ranks | 17.56 |
| GGA-PBE | 5 | 12 (TS) | ↓ 7 ranks | 8.82 |
| m-GGA-TPSS | 4 | 22 (Grimme) | ↓ 18 ranks | 23.27 |
| GGA-BLYP | 16 | 19 (Grimme) | ↓ 3 ranks | 15.85 |
| GGA-BLYP | 16 | 25 (TS) | ↓ 9 ranks | 33.04 |

**Table 90S.** Complete Structural Performance Data for 26 DFT Functionals

| Rank | Functional | Family | Bond MAE (Å) | Bond RMSE (Å) | SiOSi MAE (°) | SiOSi RMSE (°) | OSiO MAE (°) | OSiO RMSE (°) | S_TO₄ MAE (m²/g per TO₄) | S_TO₄ RMSE (m²/g per TO₄) | V_cell MAE (%) | V_cell RMSE (%) | V_TO₄ MAE (%) | V_TO₄ RMSE (%) | Density MAE (g/cm³) | Density RMSE (g/cm³) |
| --- | --- | --- | --- | --- | --- | --- | --- | --- | --- | --- | --- | --- | --- | --- | --- | --- |
| 1 | GGA-HCTH | GGA | 0.937 | 1.069 | 2.348 | 2.697 | 0.616 | 1.977 | 0.052 | 0.065 | 3.00 | 3.23 | 4.12 | 4.78 | 1.59 | 1.71 |
| 2 | m-GGA-M06-L | meta-GGA | 1.041 | 1.169 | 2.627 | 3.086 | 0.516 | 2.239 | 0.034 | 0.042 | 3.17 | 3.41 | 1.23 | 1.56 | 6.18 | 7.53 |
| 3 | GGA-PBEsol | GGA | 0.933 | 1.058 | 3.017 | 3.929 | 0.861 | 4.003 | 0.055 | 0.068 | 2.91 | 3.07 | 3.89 | 4.45 | 3.74 | 7.97 |
| 4 | m-GGA-TPSS | meta-GGA | 1.005 | 1.256 | 2.841 | 3.859 | 0.289 | 0.903 | 0.064 | 0.080 | 2.93 | 3.83 | 2.12 | 2.67 | 1.85 | 2.86 |
| 5 | GGA-PBE | GGA | 1.194 | 1.280 | 2.500 | 3.334 | 0.818 | 3.378 | 0.058 | 0.072 | 2.67 | 2.83 | 4.98 | 5.67 | 2.40 | 2.69 |
| 6 | GGA-PW91 | GGA | 1.121 | 1.207 | 2.561 | 3.445 | 0.789 | 3.361 | 0.071 | 0.088 | 3.46 | 3.61 | 4.95 | 5.67 | 2.42 | 2.73 |
| 7 | m-GGA-MS1 | meta-GGA | 1.176 | 1.445 | 2.651 | 3.965 | 0.262 | 4.205 | 0.077 | 0.096 | 3.19 | 4.24 | 2.56 | 3.12 | 2.33 | 3.01 |
| 8 | GGA-BP | GGA | 1.220 | 1.300 | 2.780 | 3.454 | 0.936 | 3.187 | 0.085 | 0.106 | 3.81 | 3.97 | 5.23 | 5.98 | 2.45 | 2.67 |
| 9 | GGA-VWN-BP | GGA | 1.236 | 1.324 | 2.775 | 3.446 | 0.795 | 3.182 | 0.088 | 0.110 | 3.44 | 3.73 | 4.89 | 5.67 | 2.43 | 2.64 |
| 10 | m-GGA-revTPSS | meta-GGA | 1.242 | 1.657 | 3.521 | 4.597 | 0.318 | 4.795 | 0.061 | 0.076 | 3.60 | 5.05 | 1.67 | 2.12 | 2.22 | 3.12 |
| 11 | GGA-PW91-OBS | GGA | 1.077 | 1.153 | 2.936 | 3.634 | 0.829 | 3.696 | 0.074 | 0.092 | 3.27 | 3.39 | 4.62 | 5.34 | 2.53 | 3.33 |
| 12 | GGA-PBE-TS | GGA | 1.090 | 1.153 | 3.022 | 3.899 | 0.991 | 3.977 | 0.081 | 0.101 | 3.27 | 3.35 | 4.73 | 5.45 | 3.41 | 4.03 |
| 13 | LDA-VWN | LDA | 0.834 | 1.099 | 2.899 | 4.128 | 0.870 | 4.476 | 0.045 | 0.056 | 2.10 | 2.98 | 1.55 | 1.93 | 5.11 | 6.87 |
| 14 | LDA-PWC | LDA | 0.681 | 1.037 | 3.231 | 4.296 | 0.934 | 4.512 | 0.047 | 0.058 | 2.35 | 3.10 | 1.58 | 1.97 | 4.75 | 6.76 |
| 15 | m-GGA-MS2 | meta-GGA | 1.429 | 1.581 | 2.861 | 3.605 | 0.863 | 3.294 | 0.092 | 0.115 | 3.66 | 4.24 | 1.89 | 2.34 | 3.86 | 4.96 |
| 16 | LDA-VWN-OBS | LDA | 0.834 | 1.128 | 3.419 | 4.664 | 0.916 | 4.926 | 0.038 | 0.047 | 1.90 | 3.05 | 1.53 | 1.91 | 6.44 | 8.18 |
| 17 | GGA-BLYP | GGA | 1.393 | 1.538 | 2.843 | 3.234 | 0.919 | 2.898 | 0.101 | 0.126 | 4.31 | 4.67 | 5.98 | 6.78 | 2.56 | 3.13 |
| 18 | LDA-PWC-OBS | LDA | 0.855 | 1.126 | 3.260 | 4.570 | 0.923 | 4.903 | 0.043 | 0.053 | 2.10 | 3.09 | 1.52 | 1.89 | 6.75 | 8.34 |
| 19 | GGA-BLYP-Grimme | GGA | 1.328 | 1.413 | 3.063 | 3.924 | 1.010 | 4.190 | 0.096 | 0.120 | 3.94 | 4.12 | 5.34 | 6.12 | 3.03 | 4.05 |
| 20 | m-GGA-TPSS-Grimme | meta-GGA | 1.499 | 1.849 | 3.912 | 5.590 | 1.330 | 6.131 | 0.124 | 0.155 | 4.82 | 5.74 | 1.45 | 1.89 | 4.40 | 6.01 |
| 21 | GGA-BOP | GGA | 1.608 | 1.812 | 2.777 | 3.154 | 0.837 | 2.604 | 0.112 | 0.140 | 4.97 | 5.55 | 6.23 | 7.12 | 3.20 | 4.08 |
| 22 | GGA-RPBE | GGA | 1.691 | 1.909 | 3.654 | 3.783 | 1.221 | 3.226 | 0.118 | 0.148 | 5.47 | 6.00 | 6.45 | 7.34 | 2.37 | 2.99 |
| 23 | GGA-PBE-Grimme | GGA | 1.018 | 1.156 | 5.002 | 6.001 | 1.124 | 4.832 | 0.106 | 0.132 | 3.12 | 3.40 | 4.82 | 5.56 | 3.34 | 4.36 |
| 24 | GGA-BLYP-TS | GGA | 1.068 | 1.112 | 6.035 | 7.008 | 1.483 | 6.390 | 0.067 | 0.084 | 2.63 | 2.67 | 4.45 | 5.12 | 9.06 | 10.97 |
| 25 | m-GGA-M11-L | meta-GGA | 2.634 | 2.766 | 4.009 | 5.592 | 0.881 | 5.921 | 0.049 | 0.061 | 7.14 | 7.44 | 1.02 | 1.34 | 10.19 | 10.90 |
| 26 | m-GGA-MS0 | meta-GGA | 3.120 | 4.571 | 4.672 | 6.857 | 0.854 | 7.453 | 0.132 | 0.165 | 9.15 | 13.86 | 2.34 | 2.89 | 2.59 | 2.79 |

**Table 91S.** Complete Energetic Performance Data for 26 DFT Functionals

| Rank | Functional | Family | Total E MAE (eV) | Total E RMSE (eV) | Binding MAE (Kcal/mol) | Binding RMSE (Kcal/mol) | Kinetic MAE | Kinetic RMSE | Electrostatic MAE | Electrostatic RMSE | XC MAE | XC RMSE | Jellium MAE | Jellium RMSE |
| --- | --- | --- | --- | --- | --- | --- | --- | --- | --- | --- | --- | --- | --- | --- |
| 1 | m-GGA-M06-L | meta-GGA | 0.0002 | 0.0022 | 0.232 | 1.289 | 0.130 | 0.886 | 0.992 | 12.768 | 0.275 | 15.574 | 2.448 | 23.580 |
| 2 | GGA-HCTH | GGA | 0.0002 | 0.0020 | 0.359 | 1.146 | 3.207 | 2.803 | 60.043 | 12.884 | 4.703 | 10.166 | 5.425 | 3.504 |
| 3 | GGA-PBEsol | GGA | 0.0002 | 0.0019 | 0.544 | 1.038 | 4.114 | 2.750 | 18.382 | 10.186 | 3.169 | 8.396 | 3.334 | 3.260 |
| 4 | m-GGA-TPSS | meta-GGA | 0.0002 | 0.0019 | 0.200 | 0.971 | 2.263 | 1.971 | 34.273 | 16.158 | 0.839 | 11.038 | 3.096 | 21.551 |
| 5 | GGA-PBE | GGA | 0.0002 | 0.0018 | 0.364 | 1.078 | 3.891 | 4.199 | 23.767 | 16.087 | 5.203 | 9.109 | 1.704 | 6.019 |
| 6 | GGA-PW91 | GGA | 0.0002 | 0.0018 | 0.189 | 1.077 | 3.841 | 3.672 | 22.568 | 13.901 | 4.851 | 8.771 | 0.757 | 4.969 |
| 7 | m-GGA-MS1 | meta-GGA | 0.0002 | 0.0019 | 0.147 | 0.958 | 0.888 | 1.355 | 21.958 | 14.340 | 0.642 | 10.457 | 2.877 | 22.168 |
| 8 | GGA-BP | GGA | 0.0002 | 0.0018 | 0.386 | 1.099 | 4.495 | 4.420 | 28.868 | 17.340 | 5.243 | 10.043 | 1.083 | 6.436 |
| 9 | GGA-VWN-BP | GGA | 0.0002 | 0.0018 | 0.359 | 1.118 | 4.540 | 4.339 | 28.728 | 17.461 | 5.164 | 10.132 | 1.027 | 6.399 |
| 10 | m-GGA-revTPSS | meta-GGA | 0.0002 | 0.0019 | 0.232 | 1.048 | 2.356 | 1.988 | 20.925 | 12.874 | 0.766 | 8.994 | 5.399 | 21.894 |
| 11 | GGA-PW91-OBS | GGA | 0.0002 | 0.0018 | 0.147 | 1.085 | 3.642 | 3.494 | 21.067 | 13.150 | 4.339 | 8.532 | 0.402 | 4.330 |
| 12 | GGA-PBE-TS | GGA | 0.0002 | 0.0018 | 2.088 | 3.659 | 3.298 | 3.953 | 47.845 | 15.060 | 10.169 | 8.653 | 1.617 | 5.458 |
| 13 | LDA-VWN | LDA | 0.0001 | 0.0022 | 0.278 | 1.200 | 6.874 | 0.435 | 10.780 | 1.384 | 0.378 | 9.410 | 4.940 | 1.377 |
| 14 | LDA-PWC | LDA | 0.0001 | 0.0022 | 0.331 | 1.204 | 6.760 | 0.483 | 10.846 | 1.554 | 0.446 | 9.783 | 4.865 | 1.274 |
| 15 | m-GGA-MS2 | meta-GGA | 0.0002 | 0.0012 | 0.864 | 1.360 | 0.174 | 1.563 | 11.745 | 13.657 | 0.970 | 11.163 | 14.747 | 18.146 |
| 16 | LDA-VWN-OBS | LDA | 0.0001 | 0.0023 | 0.139 | 1.216 | 8.177 | 0.330 | 10.214 | 0.922 | 0.352 | 9.734 | 3.770 | 1.914 |
| 17 | GGA-BLYP | GGA | 0.0003 | 0.0018 | 0.281 | 1.164 | 4.030 | 5.057 | 29.344 | 19.197 | 6.166 | 10.224 | 6.585 | 7.922 |
| 18 | LDA-PWC-OBS | LDA | 0.0001 | 0.0022 | 0.191 | 1.213 | 8.339 | 0.375 | 10.262 | 1.084 | 0.292 | 9.259 | 3.729 | 1.813 |
| 19 | GGA-BLYP-Grimme | GGA | 0.0002 | 0.0017 | 0.174 | 1.214 | 2.247 | 4.724 | 16.844 | 17.820 | 4.224 | 9.610 | 1.689 | 7.025 |
| 20 | m-GGA-TPSS-Grimme | meta-GGA | 0.0002 | 0.0019 | 0.173 | 1.106 | 6.009 | 2.458 | 36.558 | 19.763 | 0.703 | 13.265 | 11.224 | 27.395 |
| 21 | GGA-BOP | GGA | 0.0003 | 0.0018 | 0.298 | 1.202 | 5.026 | 6.729 | 43.921 | 27.413 | 6.940 | 14.067 | 8.931 | 12.100 |
| 22 | GGA-RPBE | GGA | 0.0003 | 0.0018 | 0.344 | 1.119 | 4.895 | 6.046 | 47.791 | 25.289 | 6.848 | 13.004 | 7.951 | 8.328 |
| 23 | GGA-PBE-Grimme | GGA | 0.0002 | 0.0011 | 0.376 | 1.646 | 4.364 | 4.000 | 19.214 | 15.238 | 3.791 | 10.772 | 0.696 | 5.181 |
| 24 | GGA-BLYP-TS | GGA | 0.0002 | 0.0019 | 1.542 | 4.128 | 10.237 | 3.436 | 1.348 | 12.503 | 0.484 | 8.091 | 1.653 | 2.310 |
| 25 | m-GGA-M11-L | meta-GGA | 0.0014 | 0.0037 | 0.066 | 0.747 | 0.457 | 0.976 | 386.372 | 46.626 | 0.327 | 45.274 | 6.656 | 14.192 |
| 26 | m-GGA-MS0 | meta-GGA | 0.0002 | 0.0020 | 0.038 | 0.849 | 0.499 | 1.079 | 25.849 | 13.438 | 0.890 | 13.302 | 12.061 | 24.764 |
